1 **The female-specific VC neurons are mechanically activated, feed-forward motor**  
2 **neurons that facilitate serotonin-induced egg laying in *C. elegans***

3

4 Richard J. Kopchock III<sup>1</sup>, Bhavya Ravi<sup>1,2,3</sup>, Addys Bode<sup>1</sup>, & Kevin M. Collins<sup>1,2,4</sup>

5

6 <sup>1</sup>Department of Biology, University of Miami, Coral Gables, FL 33143 USA

7 <sup>2</sup>Neuroscience Program, University of Miami School of Medicine, Miami, FL, 33136 USA

8 <sup>3</sup> Present address: Department of Neurology, Johns Hopkins University School of Medicine,  
9 Baltimore, MD USA

10

11 <sup>4</sup>To whom correspondence should be addressed:

12

13 [kevin.collins@miami.edu](mailto:kevin.collins@miami.edu)

14 Department of Biology

15 University of Miami

16 1301 Memorial Drive

17 Coral Gables, FL 33143

18 Tel: (305) 284-9058

19

20 **Abstract**

21           Successful execution of behavior requires the coordinated activity and communication  
22 between multiple cell types. Studies using the relatively simple neural circuits of invertebrates  
23 have helped to uncover how conserved molecular and cellular signaling events shape animal  
24 behavior. To understand the mechanisms underlying neural circuit activity and behavior, we  
25 have been studying a simple circuit that drives egg-laying behavior in the nematode worm *C.*  
26 *elegans*. Here we show that the female-specific, Ventral C (VC) motoneurons are required for  
27 vulval muscle contractility and egg laying in response to serotonin. Ca<sup>2+</sup> imaging experiments  
28 show the VCs are active during times of vulval muscle contraction and vulval opening, and  
29 optogenetic stimulation of the VCs promotes vulval muscle Ca<sup>2+</sup> activity. However, while  
30 silencing of the VCs does not grossly affect steady-state egg-laying behavior, VC silencing does  
31 block egg laying in response to serotonin and increases the failure rate of egg-laying attempts.  
32 Signaling from the VCs facilitates full vulval muscle contraction and opening of the vulva for  
33 efficient egg laying. We also find the VCs are mechanically activated in response to vulval  
34 opening. Optogenetic stimulation of the vulval muscles is sufficient to drive VC Ca<sup>2+</sup> activity and  
35 requires muscle contractility, showing the presynaptic VCs and the postsynaptic vulval muscles  
36 can mutually excite each other. Together, our results demonstrate that the VC neurons facilitate  
37 efficient execution of egg-laying behavior by coordinating postsynaptic muscle contractility in  
38 response to serotonin and mechanosensory feedback.

39

## 40 **Introduction**

41 A fundamental goal of neuroscience is to understand the neural basis of behavior  
42 (Bargmann & Marder, 2013). Recent work reporting the synaptic wiring diagrams, or  
43 connectomes, of nervous systems provides an unprecedented opportunity to study how the  
44 nervous system directs animal behavior (Cook et al., 2019; Lerner et al., 2016; Meinertzhagen,  
45 2018). However, there is an emerging concept in the era of connectomes: that the structure of  
46 the nervous system is insufficient to predict function (Bargmann, 2012; Batista-García-Ramó &  
47 Fernández-Verdecia, 2018). Released neurotransmitters can signal both synaptically and  
48 extrasynaptically through distinct receptors to drive short-term and long-term behavior changes  
49 (Chase et al., 2004; Donnelly et al., 2013; Koelle, 2018; Pirri et al., 2009). Neuropeptides can be  
50 co-released from synapses and signal alongside neurotransmitters (Banerjee et al., 2017;  
51 Brewer et al., 2019). Understanding how an assembly of neurotransmitter and neuromodulator  
52 signaling events drives the complex pattern of circuit activity is facilitated by direct tests in simple  
53 invertebrate animals (Bargmann & Marder, 2013) and those amenable to genetic investigation  
54 (Sengupta & Samuel, 2009). Such studies have the potential to reveal conserved neural circuit  
55 signaling mechanisms that underlie behavior.

56 The egg-laying circuit of the nematode worm *C. elegans* provides an ideal model for such  
57 a reductionist approach (Figure 1A; W. R. Schafer, 2006). In this circuit, a pair of Hermaphrodite-  
58 Specific command Neurons (HSNs) release serotonin and NLP-3 neuropeptides to promote egg-  
59 laying behavior (Brewer et al., 2019; Waggoner et al., 1998). Egg laying occurs when the vulval  
60 muscles contract in synchrony to open the vulva and allow passage of an egg from the uterus  
61 to the outside environment (Collins & Koelle, 2013). Whether serotonin signals to promote the  
62 intrinsic electrical excitability of the vulval muscles and/or to modulate input by other neuronal  
63 signaling is still not clear. As in mammals, most muscle contraction events in *C. elegans* are

64 ultimately driven by acetylcholine (ACh; Richmond & Jorgensen, 1999; Trojanowski et al., 2016).  
65 Nicotinic acetylcholine receptor (nAChR) agonists promote egg laying, a response that requires  
66 nAChRs expressed on the vulval muscles (Kim et al., 2001; Waggoner et al., 2000). However,  
67 animals deficient in ACh signaling lay their eggs more frequently, indicating that endogenous  
68 ACh inhibits egg laying (Schafer et al., 1996). These contradictory results indicate a complex  
69 role for neurotransmitter signaling events within the egg-laying circuit.

70 The hermaphrodite-specific Ventral C (VC) motoneurons are the primary cholinergic  
71 neurons of the egg-laying circuit and make prominent synapses onto the vulval muscles (Duerr  
72 et al., 2001; Pereira et al., 2015; White et al., 1986). Despite numerous studies of how the VCs  
73 signal, we still do not have a clear understanding of what the VCs actually do. Egg-laying events  
74 are always accompanied by a VC  $Ca^{2+}$  transient, but not all VC  $Ca^{2+}$  transients result in egg  
75 release (Collins et al., 2016). ACh mutants are hyperactive for egg laying (Schafer et al., 1996),  
76 resembling animals in which VC neuron development has been disrupted by laser ablation or  
77 mutation (Bany et al., 2003). This suggests ACh regulation of egg laying is closely associated  
78 with VC signaling. The VCs also extend processes along the vulva, leading to the proposal they  
79 might also relay mechanosensory or chemosensory feedback in response to vulval opening  
80 (Zhang et al., 2008). Thus, VC activity and signaling appears to regulate egg laying through  
81 multiple cellular and signaling pathways, but whether the VCs coordinate the egg laying event  
82 itself or provide sensory feedback to the rest of the animal in response to egg laying remains  
83 stubbornly unclear.

84 Here we address the function of the VC motoneurons during egg laying. We find that the  
85 VCs function within a serotonergic pathway to drive egg laying. The VCs provide excitatory input  
86 to convert the initial stages of vulval muscle contraction into a successful egg-laying event. The

87 VCs achieve this through direct activation in response to vulval muscle excitation and  
88 contraction, forming a positive feedback loop until successful egg laying is achieved.

89

## 90 **Results**

### 91 **The VC neurons promote egg laying in response to serotonin**

92 The VC neurons release ACh, and animals genetically deficient in ACh show hyperactive  
93 egg laying, releasing their embryos prematurely (Bany et al., 2003; Schafer et al., 1996). To test  
94 more directly how loss of synaptic transmission from the VC motor neurons affects egg-laying  
95 circuit activity and behavior (Figure 1B), we used a modified *lin-11* promoter/enhancer (Bany et  
96 al., 2003) to drive transgenic expression of Tetanus Toxin (Jose et al., 2007) and block synaptic  
97 transmission from all six VC neurons. Expression of Tetanus Toxin in the VC neurons did not  
98 cause any gross defects in steady-state egg accumulation compared to non-transgenic control  
99 animals, indicating that the VC neurons are not strictly required for egg laying (compare Figures  
100 1C and 1D, quantified in Figure 1G). In contrast, *egl-1(n986dm)* mutant animals in which the  
101 HSNs undergo apoptosis (Trent et al., 1983), showed a dramatic impairment of egg laying,  
102 accumulating significantly more embryos (Figures 1E and 1G). Previous studies indicated that  
103 laser ablation of both the HSNs and VCs caused additive defects in egg laying (Waggoner et al.,  
104 1998). However, transgenic expression of Tetanus Toxin in the VCs in HSN-deficient *egl-1*  
105 *1(n986dm)* mutant animals did not significantly enhance their defects in egg laying (Figure 1F  
106 and 1G). We have previously shown that wild-type animals lay their first egg around 7 hours  
107 after the L4-adult molt, a time when the VCs show their first activity (Ravi, Garcia, et al., 2018).  
108 Animals with silenced VCs showed no significant change in the onset of egg laying compared to  
109 non-transgenic control animals (Figure 1H). In contrast, the onset of egg laying in *egl-1(n968dm)*  
110 mutant animals lacking HSNs is significantly delayed, occurring about 18 hours after becoming  
111 adults (Figure 1H). Expression of Tetanus Toxin in the VCs in HSN-deficient animals did not

112 enhance the delay in egg laying significantly (Figure 1H), consistent with our results measuring  
113 steady-state egg accumulation. These results together show that signaling from the VCs is not  
114 required for egg-laying behavior to occur.

115 We next used a drug-treatment approach to explore possible functions of the VC neurons  
116 that may not be apparent in animals under standard laboratory conditions. Previous laser  
117 ablation experiments indicated that loss of the VC neurons disrupts the induction of egg laying  
118 in response to serotonin (Shyn et al., 2003; Waggoner et al., 1998). The HSNs release serotonin  
119 which potently stimulates egg laying even in conditions where egg laying is normally inhibited,  
120 such as in liquid M9 buffer (Trent et al., 1983) . Serotonin promotes egg laying in M9 buffer in  
121 wild-type animals (Figure 1I). We found that transgenic animals expressing Tetanus Toxin in the  
122 VCs failed to lay eggs in response to exogenous serotonin (Figure 1I). HSN-deficient *egl-*  
123 *1(n986dm)* mutant animals are egg-laying defective under normal conditions but will still lay eggs  
124 in response to exogenous serotonin (Schafer et al., 1996), and this response was suppressed  
125 in animals with silenced VCs (Figure 1I). This resistance to exogenous serotonin in VC-silenced  
126 animals was not unique to M9 buffer, as transgenic animals placed on serotonin-infused agar  
127 also showed a reduced egg-laying response (Figure 1J). Together, these results show that VC  
128 neurotransmitter release is required for induction of egg laying by exogenous serotonin.

129 It was possible that the observed defects in serotonin response caused by VC silencing  
130 could be due to impaired circuit development and/or by compensatory changes in circuit activity.  
131 Expression from the VC-specific promoter used to drive Tetanus Toxin begins in the L4 stage  
132 as the egg-laying circuit is completing development, well before the onset of egg-laying behavior  
133 (Ravi, Garcia, et al., 2018). To silence the VCs acutely after circuit development is complete, we  
134 transgenically expressed Histamine-gated chloride channels (HisCl) and treated the animals  
135 with exogenous histamine (Pokala et al., 2014; Ravi, Garcia, et al., 2018). Histamine silencing

136 of the VCs caused no gross changes in steady-state egg accumulation (Figure 1K), confirming  
137 the results with Tetanus Toxin that VC neurotransmission is not required for egg laying.  
138 However, acute histamine silencing of the VCs reduced egg laying in response to serotonin in  
139 both wild-type and HSN-deficient *egl-1(n986dm)* mutant animals (Figure 1L). Together, these  
140 results show that both VC neuron activity and synaptic transmission are dispensable for egg  
141 laying under normal growth conditions, but the VCs are required for egg laying in response to  
142 exogenous serotonin.

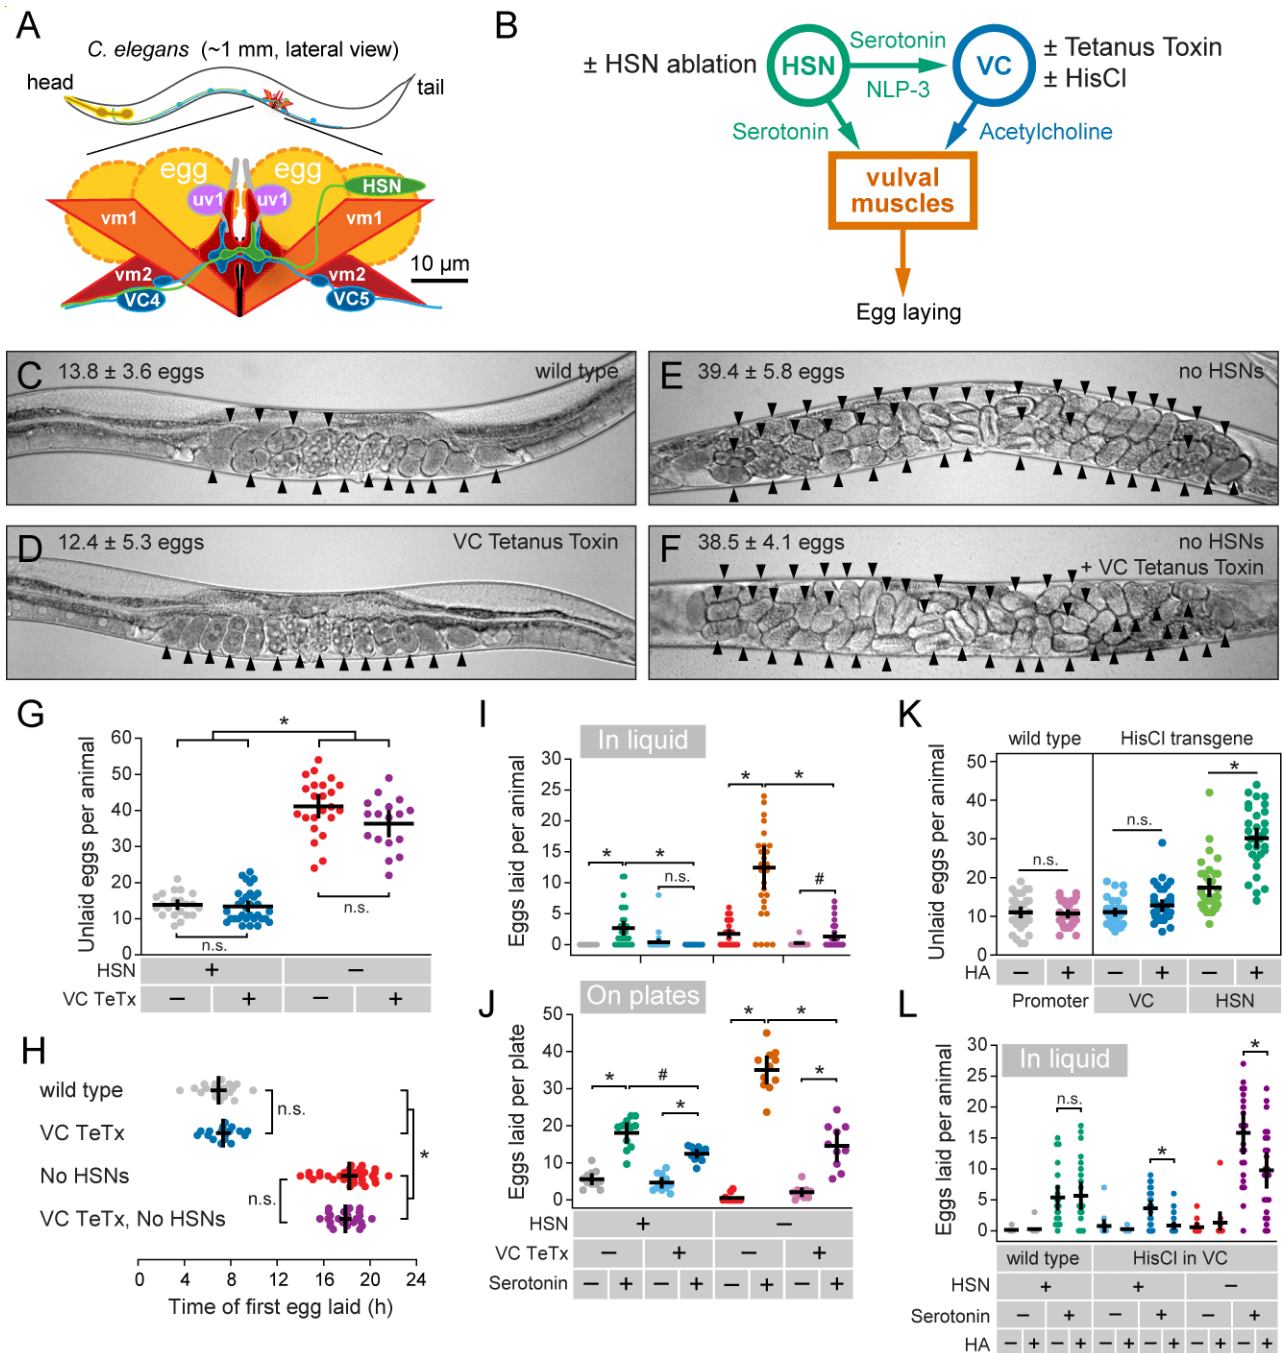

143

144 **Figure 1. VC neurotransmission is required for serotonin-induced egg laying.**

145 (A) Graphical representation of the *C. elegans* egg-laying circuit (Collins et al., 2016). (B) Circuit  
 146 diagram of the synapses and the primary neurotransmitters released between the HSN neurons,  
 147 VC neurons, and vulval muscles. (C-F) Representative images of the *C. elegans* uterus showing  
 148 unlaidd eggs (arrowheads) in wild-type, transgenic animals expressing Tetanus Toxin (TeTx) in  
 149 the VCs, and HSN-ablated *egl-1(986dm)* mutant animals. (G) Scatter plot of unlaidd eggs in  
 150 animals from Figure 1C-F ( $\pm 95$  confidence intervals for the mean); asterisks indicate  $p < 0.0001$   
 151 and n.s. indicates  $p > 0.05$  (one-way ANOVA with Bonferroni's correction for multiple



152 comparisons). **(H)** Scatter plot showing timing of first egg laid after the larval to adult molt in  
153 animals with blocked VC neurotransmission and ablated HSNs (asterisk indicates  $p < 0.0001$ ,  
154 one-way ANOVA with Bonferroni's correction for multiple comparisons). **(I)** Blockage of VC  
155 synaptic transmission inhibits serotonin-induced egg laying. Animals expressing TeTx in the VCs  
156 were placed into M9 buffer or M9 containing 18.5 mM serotonin; asterisks indicate  $p \leq 0.0002$ ,  
157 pound indicates  $p = 0.0225$  and n.s. indicates  $p > 0.05$  (Kruskal-Wallis test with Dunn's correction  
158 for multiple comparisons). **(J)** Animals with silenced VCs still fail to lay eggs in response to 18.5  
159 mM serotonin under otherwise normal culturing conditions on plates; asterisks indicate  
160  $p < 0.0001$ , pound indicates  $p = 0.0026$ , and n.s. indicates  $p > 0.05$  (one-way ANOVA with  
161 Bonferroni's correction for multiple comparisons). **(K)** Measurement of steady-state egg  
162 accumulation in animals expressing Histamine-gated chloride channels (HisCl) in either the VC  
163 or HSN neurons grown with or without histamine; asterisk indicates  $p < 0.0001$  and n.s. indicates  
164  $p > 0.05$  (one-way ANOVA with Bonferroni's correction for multiple comparisons). **(L)** Silencing of  
165 the VCs blocks serotonin-induced egg laying. Animals expressing HisCl in the VCs were  
166 incubated with 0 or 4 mM histamine for four hours, placed into wells with M9 buffer with 0 or 18.5  
167 mM serotonin, and the number of eggs laid after 1 hour were counted; asterisks indicates  $p < 0.05$   
168 and n.s. indicates  $p > 0.05$  (Kruskal-Wallis test with Dunn's correction for multiple comparisons).  
169

## 170 **VC Ca<sup>2+</sup> activity is coincident with vulval muscle activity and egg laying**

171 The VC neurons show rhythmic Ca<sup>2+</sup> activity during the egg-laying active state (Collins et  
172 al., 2016). However, only ~1/3 of VC Ca<sup>2+</sup> transients were temporally coincident with vulval  
173 muscle contractions that resulted in egg release (Collins et al., 2016), raising questions about  
174 the function of the VC Ca<sup>2+</sup> transients that do not coincide with egg laying. To understand the  
175 function of this VC activity we expressed GCaMP5 in the VC neurons to measure Ca<sup>2+</sup> dynamics  
176 in cell bodies and processes most proximal to the vulva while simultaneously recording vulval  
177 opening and egg-laying behavior in a separate brightfield channel, as described (Collins &  
178 Koelle, 2013). As expected, we found vulval openings that result in egg release were nearly  
179 always accompanied by a VC Ca<sup>2+</sup> transient, but not every VC Ca<sup>2+</sup> transient resulted in an egg-  
180 laying event (**Figure 2B; Movie 1**). These remaining VC Ca<sup>2+</sup> transients were almost always  
181 observed with partial opening of the vulva (**Figure 2C**). As quantified in **Figure 2F**, we found that  
182 48% of VC Ca<sup>2+</sup> transients were associated with weak vulval openings we termed twitches  
183 (Collins & Koelle, 2013) and 39% of VC Ca<sup>2+</sup> transients were associated with strong openings

184 that supported egg release. To determine if presynaptic HSN activity was sufficient to drive VC  
185 and vulval muscle activity downstream, we optogenetically stimulated HSNs transgenically  
186 expressing Channelrhodopsin-2 and simultaneously recorded VC  $\text{Ca}^{2+}$  activity and vulval  
187 muscle contractility (Figure 2A; Movie 2). Optogenetic stimulation of HSNs drove a robust  
188 increase in VC  $\text{Ca}^{2+}$  transients that were associated with egg-laying events, but we still observed  
189 VC  $\text{Ca}^{2+}$  transients during the weaker vulval muscle twitching contractions (Figure 2D). HSN  
190 optogenetic stimulation elevated average  $\text{Ca}^{2+}$  levels in the VCs rapidly, within 5 seconds after  
191 blue light exposure (Figure 2E). The light-dependent increase in VC  $\text{Ca}^{2+}$  activity and vulval  
192 muscle contractions were not observed in animals grown without the essential cofactor, all-trans-  
193 retinal (ATR; Figure 2D and 2E). During optogenetic HSN activation, 60% of VC  $\text{Ca}^{2+}$  transients  
194 were associated with egg-laying events while only 35% were associated with vulval muscle  
195 twitches, a significant difference from control animals not subjected to HSN optogenetic  
196 stimulation that we attribute to an increase in egg laying frequency (Figure 2F). Because VC  
197  $\text{Ca}^{2+}$  activity rises at the same time as vulval opening and prior to egg release, these results are  
198 consistent with a model where either the VCs promote vulval muscle contractility and vulval  
199 opening, or a model where the VCs are activated in response to downstream vulval muscle  
200 contraction and/or vulva opening.

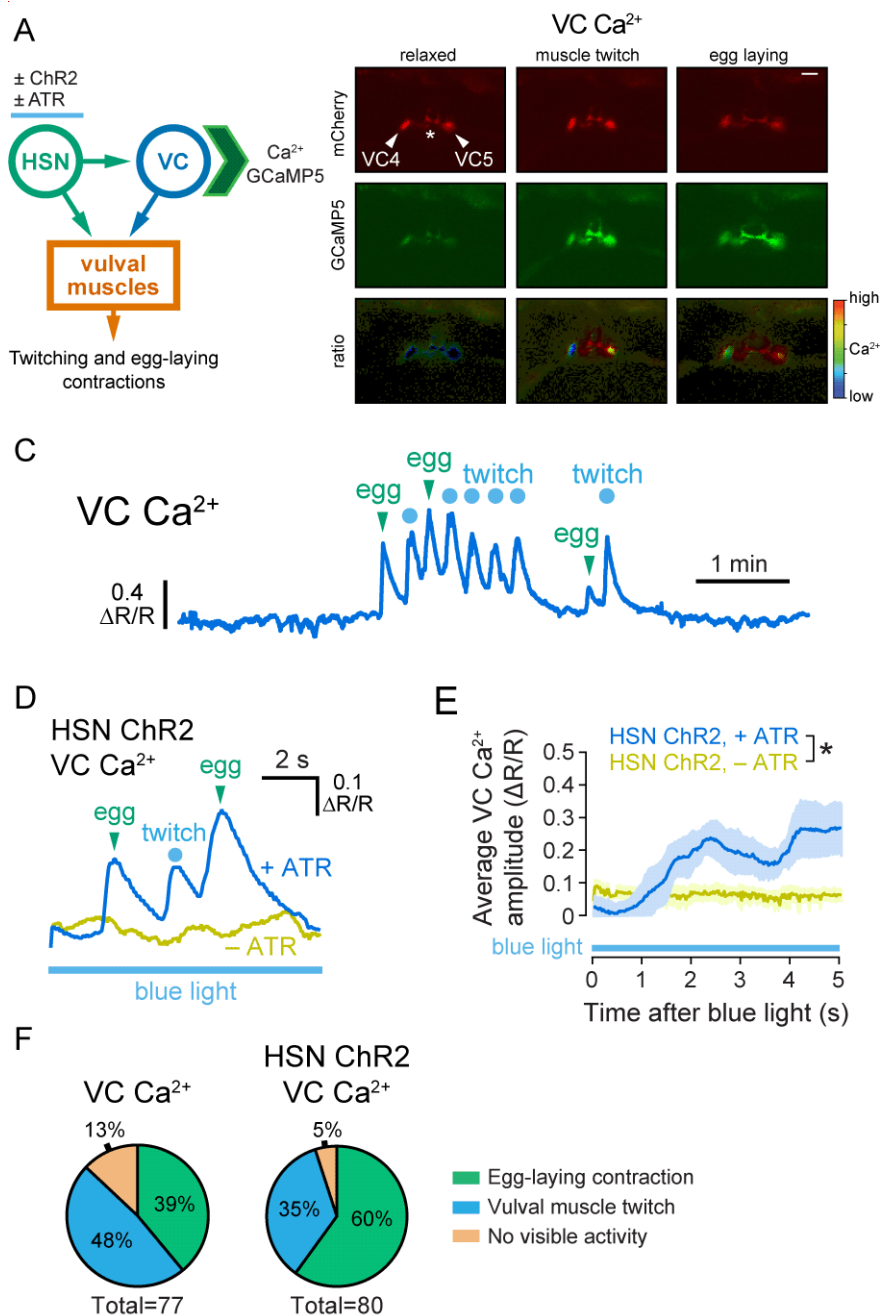

201

202 **Figure 2. The VC neurons are active during both weak vulval muscle twitching and strong**  
 203 **egg-laying contractions.**

204 (A) Cartoon of circuit and experiments. GCaMP5 was expressed in the VC neurons to record  
 205 Ca<sup>2+</sup> activity, and Channelrhodopsin-2 was expressed in HSNs to provide optogenetic  
 206 stimulation of egg laying. (B) Representative still images of VC mCherry, GCaMP5, and  
 207 GCaMP5/mCherry ratio ( $\Delta R/R$ ) during inactive and active egg-laying behavior states. Asterisk  
 208 indicates vulva. Scale bar is 20  $\mu\text{m}$ . (C) Representative trace of VC GCaMP5/mCherry Ca<sup>2+</sup>  
 209 ratio in freely behaving, wild-type animals during an egg-laying active state. (D) Representative  
 210 trace of VC GCaMP5/mCherry Ca<sup>2+</sup> ratio after optogenetic stimulation of ChR2 in the HSN  
 211 neurons in animals grown in the absence (-ATR, top) and presence (+ATR, bottom) during 10  
 212 s of continuous blue light exposure. (E) Average vulval muscle Ca<sup>2+</sup> levels (mean  $\pm$ 95%

213 confidence intervals from 10 animals; asterisk indicates  $p < 0.0001$ , Student's t test). (F) Graph  
214 showing vulval muscle contractile activity for each VC  $\text{Ca}^{2+}$  transient during endogenous egg-  
215 laying active states (left) or in response to HSN optogenetic stimulation (right).  
216

## 217 **The VC neurons promote vulval muscle activity and contraction**

218 The VC motor neurons synapse onto the vulval and body muscles where they are thought  
219 to release acetylcholine to drive contraction (Duerr et al., 2008; White et al., 1986; Zhang et al.,  
220 2008). While VC activity and neurotransmission is not required for egg laying (Figure 1G and  
221 1K; Laura E. Waggoner et al., 1998), the VCs may still release ACh to regulate vulval muscle  
222 contractility. To test if the VCs can excite the vulval muscles directly, we expressed  
223 Channelrhodopsin-2 in the VC neurons and performed ratiometric  $\text{Ca}^{2+}$  imaging in the vulval  
224 muscles after exposure to blue light (Figure 3A; Movie 3). Optogenetic stimulation of the VCs  
225 led to an acute induction of vulval muscle  $\text{Ca}^{2+}$  activity within 5 s but was unable to drive full  
226 vulval muscle contractions and egg release (Figure 3B and 3C). However, average vulval muscle  
227  $\text{Ca}^{2+}$  transient amplitude after optogenetic stimulation was not significantly higher through the  
228 duration of the recording (Figure 3D). Vulval muscle  $\text{Ca}^{2+}$  transient frequency was reduced,  
229 which may result from the increased duration of each individual transient (Figures 3E and 3F).  
230 This result shows that VC activity alone is not able to maximally excite the vulval muscles to the  
231 point of egg laying, but that VC activity is excitatory and can sustain ongoing vulval muscle  $\text{Ca}^{2+}$   
232 activity. We find these results consistent with a model where serotonin and NLP-3 neuropeptides  
233 released from HSN signal to enhance the excitability and contractility of the vulval muscles for  
234 egg laying while the ACh released from the VCs prolong the contractile phase to facilitate egg  
235 release.

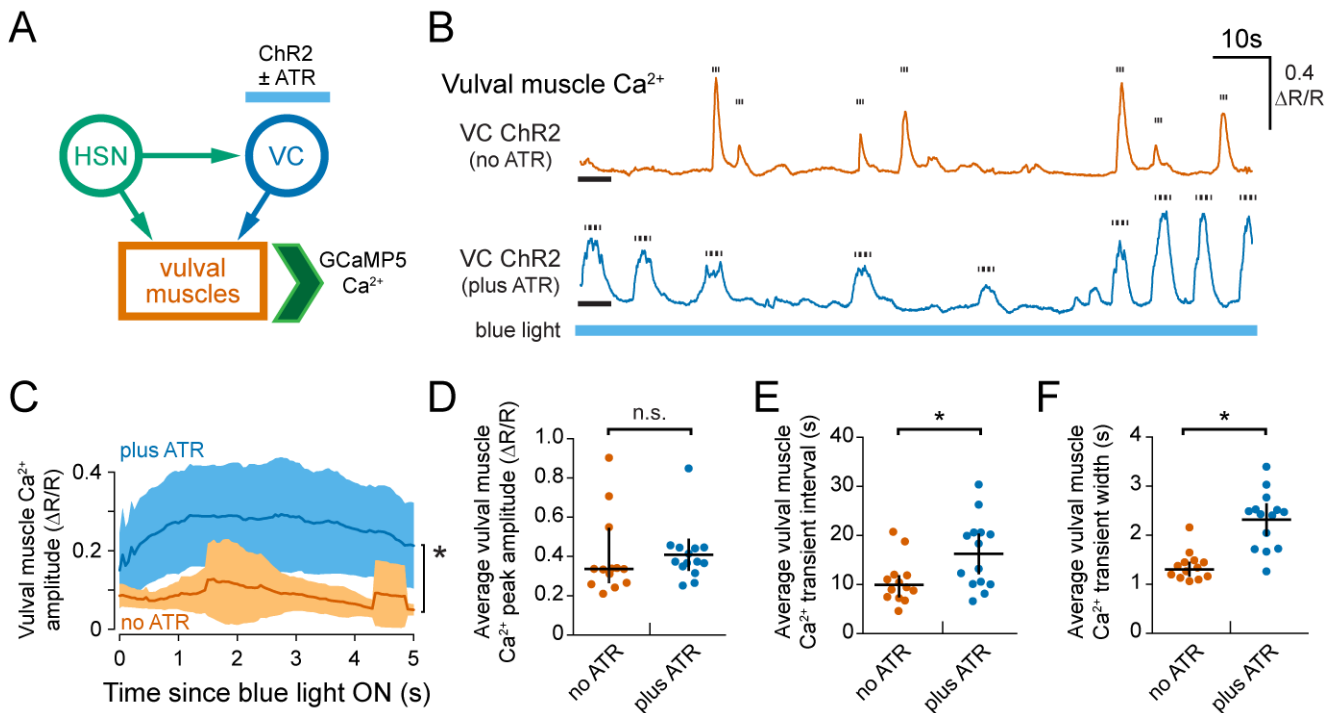

236

237 **Figure 3. Optogenetic VC activation induces and sustains vulval muscle  $\text{Ca}^{2+}$  activity.**

238 (A) Cartoon of circuit and experiment. Channelrhodopsin-2 was expressed in the VC neurons and  
 239 GCaMP5 was expressed in the vulval muscles. (B) Representative traces of vulval muscle  
 240 GCaMP5/mCherry  $\text{Ca}^{2+}$  ratio ( $\Delta\text{R/R}$ ) in animals grown in the absence (-ATR, top) or presence  
 241 (+ATR, bottom) in response to 5 minutes of continuous blue light exposure. Tick marks show  
 242 duration at half-maximal amplitude of each measured  $\text{Ca}^{2+}$  transient. Black bar indicates first 5  
 243 seconds following blue light exposure. (C) Averaged vulval muscle  $\text{Ca}^{2+}$  transient activity  
 244 (shaded region indicates  $\pm 95\%$  confidence intervals) during the first 5 seconds of optogenetic  
 245 activation of the VC neurons in -ATR (control; blue) and +ATR conditions (orange; asterisk  
 246 indicates  $p=0.003$ , Student's t test;  $n \geq 13$  animals). (D) Scatterplot showing the average peak  
 247 amplitude of vulval muscle  $\text{Ca}^{2+}$  transients ( $\pm 95\%$  confidence intervals) per animal in response  
 248 to VC optogenetic stimulation during 5 minutes of continuous blue light (n.s. indicates  $p > 0.05$ ;  
 249 Student's t test). (E) Scatterplot showing the average time between vulval muscle  $\text{Ca}^{2+}$  transients  
 250 ( $\pm 95\%$  confidence intervals) per animal during VC optogenetic stimulation during 5 minutes of  
 251 continuous blue light (asterisk indicates  $p=0.0236$ , Student's t test). (F) Scatterplot showing the  
 252 average vulval muscle  $\text{Ca}^{2+}$  transient width ( $\pm 95\%$  confidence intervals) per animal during VC  
 253 optogenetic stimulation during 5 minutes of continuous blue light (asterisk indicates  $p < 0.0001$ ,  
 254 Student's t test; error bars indicate 95% confidence intervals for the mean).  
 255

256 **The VCs facilitate successful vulval opening during egg laying**

257 Loss of VC activity or synaptic transmission caused a specific defect in serotonin-induced  
 258 egg laying, suggesting the VCs are required for proper vulval muscle  $\text{Ca}^{2+}$  activity and/or

259 contractility. We recorded vulval muscle  $\text{Ca}^{2+}$  activity in freely behaving animals transgenically  
260 expressing Tetanus Toxin in the VCs (Figure 4A; Movie 4). Vulval muscle  $\text{Ca}^{2+}$  activity in wild-  
261 type animals is characterized by low activity during the ~20 minute egg-laying inactive state, and  
262 periods of high activity during the ~2 minute egg-laying active state (Figure 4B; Collins et al.,  
263 2016; Laura E. Waggoner et al., 1998). Expression of Tetanus Toxin in the VCs did not  
264 significantly affect the overall frequency or amplitude of vulval muscle  $\text{Ca}^{2+}$  transients during  
265 egg-laying inactive states compared to wild-type control animals (Figures 4C and 4D). However,  
266 inhibition of VC neurotransmission led to larger amplitude  $\text{Ca}^{2+}$  transients during the active phase  
267 (Figure 4D). Since previous work suggested the VCs release ACh that inhibits egg laying (Bany  
268 et al., 2003), the simplest explanation for this phenotype would be that the VCs normally inhibit  
269 vulval muscle  $\text{Ca}^{2+}$  activity. However, our results show optogenetic activation of the VCs  
270 increased vulval muscle  $\text{Ca}^{2+}$  transient duration with minimal effect on amplitude (Figures 3C,  
271 3D, and 3F). Further inspection of vulval muscle  $\text{Ca}^{2+}$  traces of individual animals showed that  
272 transgenically expressing Tetanus Toxin in the VCs had large vulval muscle  $\text{Ca}^{2+}$  transients of  
273 amplitude similar to egg-laying  $\text{Ca}^{2+}$  transients ( $>1.0 \Delta R/R$ ), but without an egg being  
274 successfully released (Figure 4B and 4E; Movie 4). We termed these “failed egg-laying events.”  
275 Such failed egg-laying events were infrequent in vulval muscle  $\text{Ca}^{2+}$  recordings from wild-type  
276 animals, but they occurred more frequently than successful egg-laying events in transgenic  
277 animals expressing Tetanus Toxin in the VCs (Figure 4E). Based on these results, it appears  
278 that VC neurotransmission does not initiate vulval muscle  $\text{Ca}^{2+}$  transients but is instead critical  
279 for coordinating vulval muscle  $\text{Ca}^{2+}$  activity and contraction across the vulval muscle cells to  
280 allow for successful egg release.

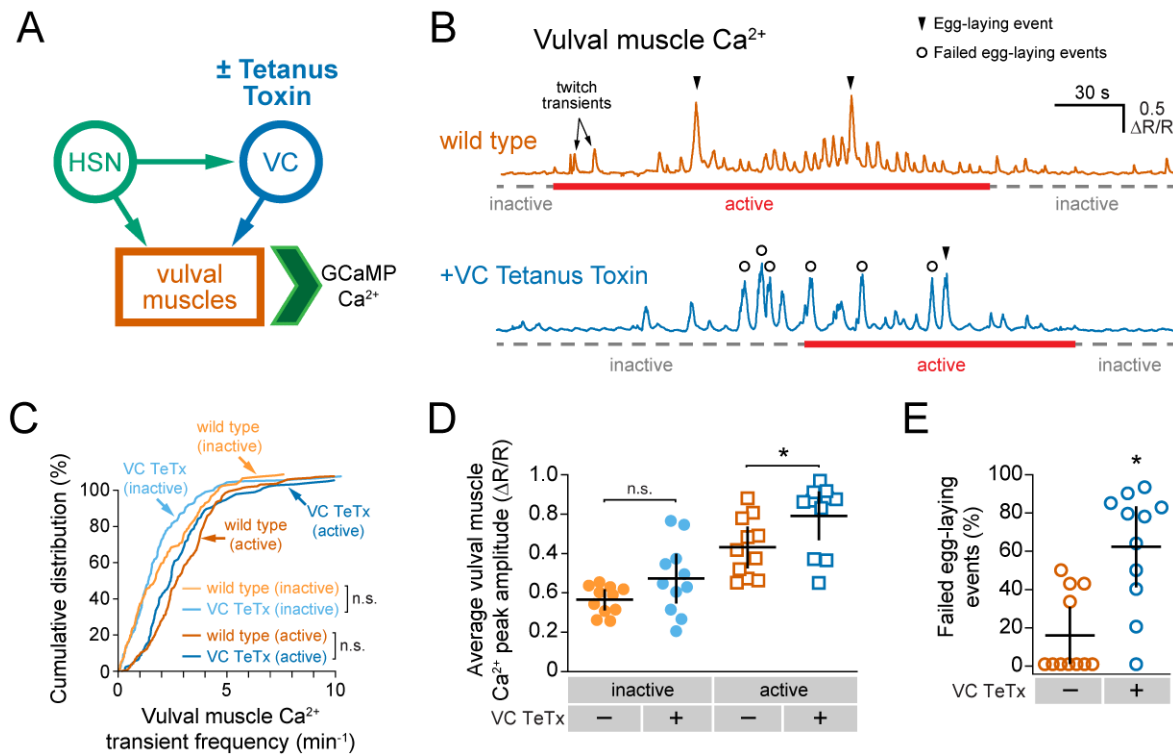

281

282 **Figure 4. Blocking VC neurotransmission reduces the success rate of egg laying.**

283 (A) Cartoon of circuit and experiment. Tetanus Toxin (TeTx) was expressed in the VC neurons  
 284 to block their neurotransmitter release and GCaMP5 was expressed in the vulval muscles to  
 285 record Ca<sup>2+</sup> activity. (B) Representative traces of vulval muscle GCaMP5/mCherry Ca<sup>2+</sup>  
 286 (ΔR/R) in wild-type (top) and Tetanus Toxin expressing transgenic animals (bottom).  
 287 Arrowheads indicate successful egg-laying events, and open circles indicate strong (>1.0 ΔR/R)  
 288 vulval muscle Ca<sup>2+</sup> transients of “failed egg-laying events.” Egg-laying behavior state (inactive  
 289 or active) duration is indicated below each trace. (C) Cumulative distribution plots of all vulval  
 290 muscle Ca<sup>2+</sup> transients across wild-type and transgenic animals expressing TeTx in the VCs.  
 291 Transients were parsed into egg-laying active and inactive phases (n.s. indicates p>0.05,  
 292 Kruskal-Wallis test with Dunn’s correction for multiple comparisons). (D) Average vulval muscle  
 293 Ca<sup>2+</sup> transient peak amplitudes per animal during the inactive and active egg-laying phase  
 294 (asterisk indicates p=0.0336, one-way ANOVA with Bonferroni’s correction for multiple  
 295 comparisons). (E) Percentage of failed egg-laying events in wild-type and transgenic animals  
 296 expressing TeTx in the VCs (asterisk indicates p=0.0014, Mann-Whitney test; n=11 animals per  
 297 genotype).

298

299 Egg laying is a two-step process where strong vulval muscle Ca<sup>2+</sup> activity drives the  
 300 synchronous contraction of all vulval muscle cells across both the anterior and posterior halves  
 301 (Brewer et al., 2019; Li et al., 2013) that allows for the mechanical opening of the vulva in phase

302 with locomotion for efficient egg release (Collins et al., 2016; Collins & Koelle, 2013). Egg-laying  
303 events are characterized by coordinated  $\text{Ca}^{2+}$  activity between the vm1-type vulval muscles that  
304 extend to the ventral tips of the vulva and the medial vm2-type vulval muscles that lead to  
305 contraction (Figure 5A). This  $\text{Ca}^{2+}$  activity is distinct from weak vulval muscle twitching  
306 contractions that are confined to the vm1 muscles (Figure 5A; Collins & Koelle, 2013). To  
307 understand why egg laying was less likely to occur during strong vulval muscle  $\text{Ca}^{2+}$  transients  
308 in VC-silenced animals, we measured features of contractile events during egg laying.  
309 Contraction can be directly quantified by measuring the reduction in muscle area in fluorescent  
310 micrographs, and vulval opening can be quantified by measuring the changing distance between  
311 the anterior and posterior muscle halves (Figure 5A). During egg-laying events in wild-type  
312 animals, a strong cytosolic  $\text{Ca}^{2+}$  transient drives a  $\sim 50 \mu\text{m}^2$  contraction of muscle size followed  
313 by a rebound phase after egg release (Figure 5B, top and middle). Simultaneously, the anterior  
314 and posterior muscles separate by  $\sim 10 \mu\text{m}$ , facilitating egg release (Figure 5B, bottom). We  
315 found few differences in the kinetics or extent of vulval muscle opening between wild-type and  
316 Tetanus Toxin-expressing transgenic animals during successful egg-laying events (compare  
317 Figures 5B and 5C). The vulval muscles opened wider and the degree of contraction was greater  
318 during egg-laying events in animals where VC transmission was silenced with Tetanus Toxin  
319 (Figure 5C), possibly because the vulval muscle  $\text{Ca}^{2+}$  rise started earlier in these animals. During  
320 failed egg-laying events, the vulval muscles showed only modest contraction and only separated  
321 by  $\sim 5 \mu\text{m}$ , insufficient to allow egg release, despite reaching similar levels of cytosolic  $\text{Ca}^{2+}$   
322 (Figure 5D). This failure to open the vulva was more pronounced in animals where VC  
323 transmission was blocked by Tetanus Toxin (compare Figures 5D and 5E). In contrast, animals  
324 with silenced VC transmission have many more failed egg-laying events and exhibit vulval  
325 opening kinetics more similar to twitches (Figure 5F). To understand the relationship between  
326 vulval muscle  $\text{Ca}^{2+}$  levels and vulval opening, we measured the distance between anterior and



327 posterior vulval muscles during weak twitching, failed egg-laying events, and successful egg-  
328 laying events (Figure 5F). In both wild-type and Tetanus Toxin-expressing animals, we noted a  
329 linear relationship of low but positive slope between vulval opening and  $\text{Ca}^{2+}$  levels  $<1.0 \Delta\text{R/R}$   
330 ( $\Delta\text{opening} / \Delta\text{Ca}^{2+}$ ) during weak twitching contractions (Figure 5F and 5G). However, as  $\text{Ca}^{2+}$   
331 levels rose above  $1.0 \Delta\text{R/R}$ , the muscles reached threshold for full opening, allowing successful  
332 egg release (Figure 5F). The steep, linear  $\Delta\text{opening} / \Delta\text{Ca}^{2+}$  relationship during failed egg-laying  
333 events suggests a threshold of  $\text{Ca}^{2+}$  drives an all-or-none transition to full contraction, vulval  
334 opening, and egg release. In VC-silenced animals, the shallow  $\Delta\text{opening} / \Delta\text{Ca}^{2+}$  relationship  
335 continued as weak twitches transitioned into failed egg-laying events, with many strong vulval  
336 muscle  $\text{Ca}^{2+}$  transients failing to open the vulva sufficiently for egg release (Figure 5G). However,  
337 successful egg-laying events in VC-silenced animals still showed a sharp threshold between  
338  $\text{Ca}^{2+}$  levels and the degree of vulval opening. This raises the possibility of two types of failed  
339 egg-laying events: one that is shared with wild-type animals, and another that is unique to VC-  
340 silenced animals.

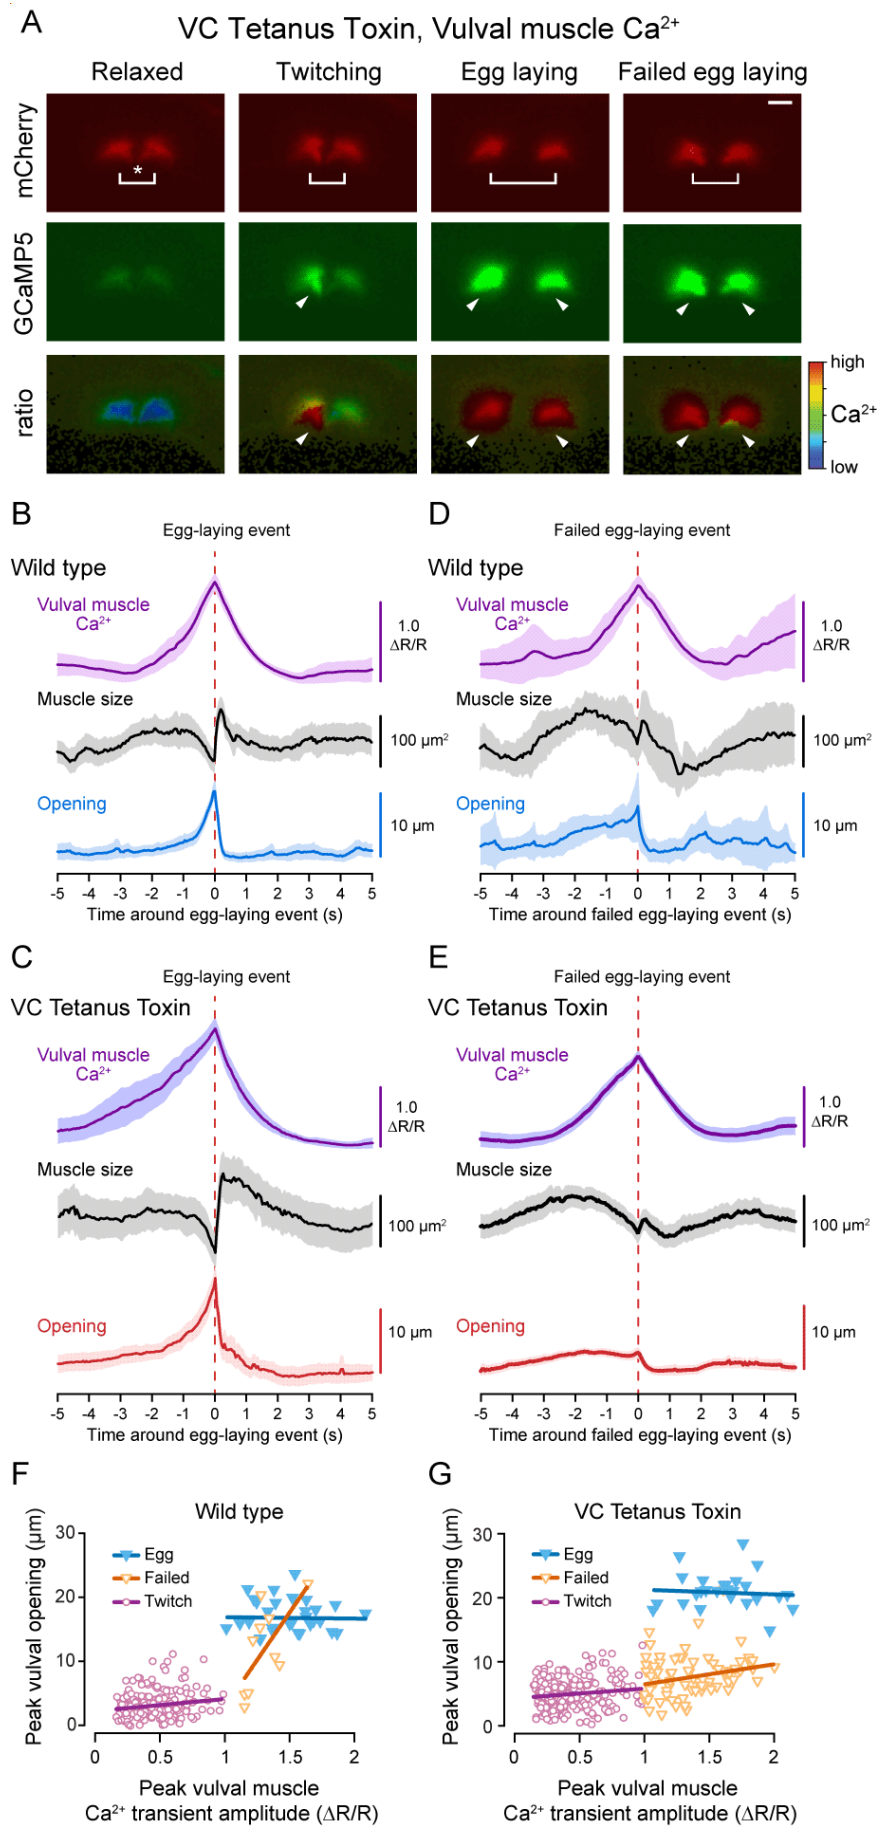

342 **Figure 5: Blocking VC neurotransmission decouples vulval muscle Ca<sup>2+</sup> activity and egg**  
343 **laying.**

344 (A) Vulval muscle sizes and distances were quantified by measuring the changes in area and  
345 centroid of the anterior and posterior muscle groups in mCherry channel micrographs during  
346 GCaMP5/mCherry ratiometric imaging. Shown are still images of the vulval muscles during  
347 representative muscle states of relaxation, twitching, egg laying, and failed egg-laying events.  
348 Brackets indicate the distance between the centroid of vulval muscle halves, arrowheads  
349 indicate high Ca<sup>2+</sup> activity, and asterisk indicates vulva. Scale bar is 20 μm. (B-D) Mean traces  
350 (±95 confidence intervals) of vulval muscle Ca<sup>2+</sup> (GCaMP5/mCherry ratio), vulval muscle area  
351 (μm<sup>2</sup>), and vulval muscle centroid distance (μm) during successful (B and C) and failed egg-  
352 laying events (D and E) in wild-type (B and D) and transgenic animals expressing Tetanus Toxin  
353 in the VC neurons (C and E). (E-F) Scatter plot showing peak vulval muscle Ca<sup>2+</sup> amplitude in  
354 relation to the corresponding vulval muscle opening distance in wild-type (E) and transgenic  
355 animals expressing Tetanus Toxin in the VC neurons (F). Lines through points represent simple  
356 linear regression for each labeled grouping.

357

358 **VC neurotransmission regulates HSN command neuron and egg-laying circuit activity**

359 The VC motor neurons have a number of synaptic partners, such as the vulval muscles,  
360 various locomotion motor neurons, and the HSN neurons (White et al., 1986). The HSN neurons  
361 are particularly interesting due to them being critical for egg-laying behavior and sharing  
362 significant sites of cross-innervation with the VCs (Schafer, 2006; White et al., 1986). The VC  
363 neurons have been suggested to release ACh which signals to inhibit egg-laying behavior via  
364 muscarinic GAR-2 receptors on the HSN neurons (Bany et al., 2003; Zhang et al., 2008). The  
365 HSNs variably express two muscarinic acetylcholine receptors, GAR-1 and GAR-2 (Fernandez  
366 et al., 2020). To determine whether VC synaptic transmission regulates egg laying via HSN, we  
367 recorded HSN Ca<sup>2+</sup> activity in wild-type and transgenic animals expressing Tetanus Toxin in the  
368 VCs (Figure 6A). We observed a significant increase in HSN Ca<sup>2+</sup> transient frequency when VC  
369 synaptic transmission was blocked compared to non-transgenic control animals (Figure 6B). We  
370 have previously shown that vulval muscle Ca<sup>2+</sup> activity produces a retrograde signal that sustains

371 burst firing in the presynaptic HSNs, which could be mediated by the VC neurons (Ravi, Garcia,  
372 et al., 2018). Such HSN burst firing during egg-laying active states is not driven by successful  
373 egg-laying events but is enhanced by egg accumulation and feedback of vulval muscle  $Ca^{2+}$   
374 activity (Ravi, Garcia, et al., 2018). We found that animals where VC synaptic transmission was  
375 blocked with Tetanus Toxin showed increased burst firing in HSN. While wild-type animals spent  
376 ~11% of their time showing high frequency activity in the HSN neurons, transgenic animals  
377 expressing Tetanus Toxin in the VC neurons spent ~21% showing high frequency burst firing  
378  $Ca^{2+}$  transients in the HSN neurons (Figure 6D). Because burst firing was increased in VC  
379 Tetanus Toxin transgenic animals, synaptic transmission from the VCs does not mediate the  
380 retrograde signal between the HSN neurons and vulval muscles. Once again, the simplest  
381 explanation for these results would be that VC neurotransmission is instead inhibitory toward the  
382 HSNs such as proposed in previous studies (Bany et al., 2003; Zhang et al., 2008), but the  
383 steady-state egg accumulation of animals expressing VC-specific Tetanus Toxin or HisCl is  
384 normal (Figure 1G, K). Because VC Tetanus Toxin expressing animals also have more frequent  
385 failed egg-laying events (Figure 5E), we propose that the increased HSN burst firing we see in  
386 VC Tetanus Toxin transgenic animals results from the egg-laying circuit entering into and staying  
387 in the active state until it receives feedback of successful egg release, not just feedback of  
388 ongoing vulval muscle  $Ca^{2+}$  activity.

389

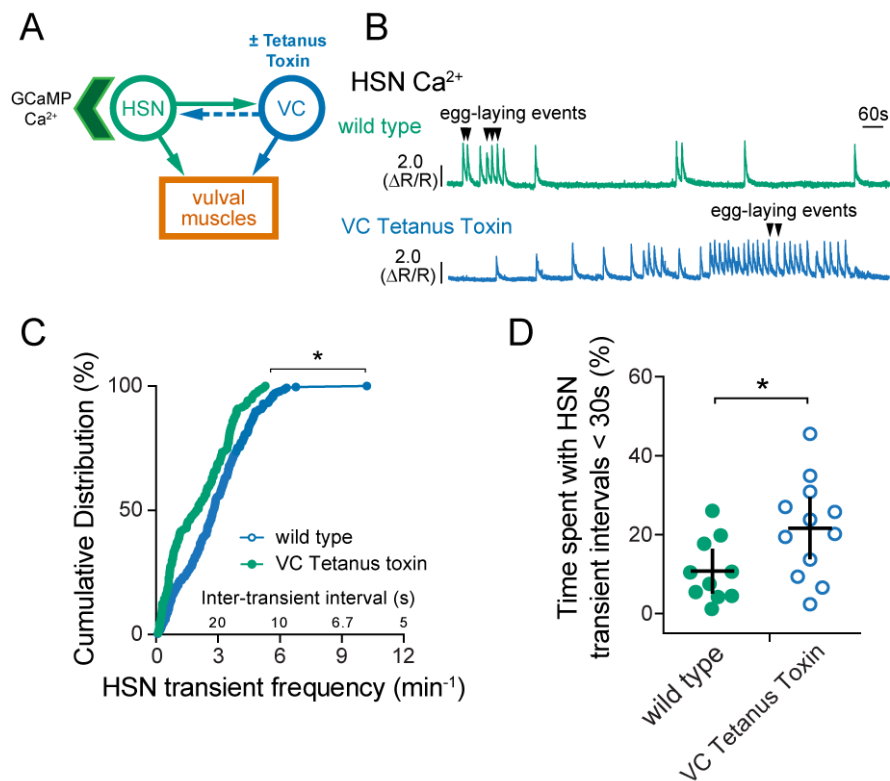

390

391 **Figure 6. Blocking VC neurotransmission increases HSN Ca<sup>2+</sup> activity.**

392 **(A)** Cartoon of circuit and the experiment. Tetanus Toxin (TeTx) was expressed in the VC  
393 neurons to block their neurotransmitter release and HSN Ca<sup>2+</sup> activity was recorded through  
394 GCaMP5 imaging. **(B)** Representative traces of HSN neuron GCaMP5/mCherry Ca<sup>2+</sup>  
395 (ΔR/R) in a wild-type background (top, green) and animals expressing Tetanus Toxin in the VCs  
396 (bottom, blue). **(C)** Cumulative distribution plots of the instantaneous frequency of HSN Ca<sup>2+</sup>  
397 transients in wild-type and Tetanus Toxin-expressing animals (asterisk indicates p=0.0006,  
398 Kolmogorov-Smirnov test). **(D)** Scatter plot for the percentage of time each animal spent with  
399 HSN Ca<sup>2+</sup> inter-transient intervals that were less than 30 seconds, an indicator of hyperactivity  
400 (asterisk indicates p=0.00272, Student's test; error bars indicate 95% confidence intervals for  
401 the mean).

402

403 **The VC motor neurons are responsive to vulval muscle activity and contraction**

404 VC Ca<sup>2+</sup> activity is coincident with strong vulval muscle twitching and egg-laying  
405 contractions (**Figure 2**; Collins et al., 2016). In addition to making synapses onto the vm2  
406 muscles whose contraction drives egg laying, the VCs extend neurites along the vulval  
407 hypodermis devoid of synapses (White et al., 1986), suggesting the VCs may respond to vulval

408 opening. To test this model, we sought to induce vulval opening independent of endogenous  
409 circuit activity and presynaptic input from the HSNs. We transgenically expressed  
410 Channelrhodopsin-2 specifically in the vulval muscles using the *ceh-24* promoter to stimulate  
411 the vulval muscles and used GCaMP5 to record blue-light induced changes in vulval muscle  
412  $Ca^{2+}$  activity (Figure 7A and Movie 5). Optogenetic stimulation of the vulval muscles triggered  
413 an immediate rise in vulval muscle cytosolic  $Ca^{2+}$ , tonic contraction of the vulval muscles, vulval  
414 opening, and egg release (Figures 7B and 7C). Even though optogenetic stimulation resulted in  
415 sustained vulval muscle  $Ca^{2+}$  activity and contraction, vulval opening and egg release remained  
416 rhythmic and phased with locomotion, as previously observed in wild-type animals (Collins et  
417 al., 2016; Collins & Koelle, 2013). Simultaneous bright field recordings showed the vulva only  
418 opened for egg release when the adjacent ventral body wall muscles were in a relaxed phase  
419 (Movie 6). We have previously shown that eggs are preferentially released when the vulva is at  
420 a particular phase of the body bend, typically as the ventral body wall muscles anterior to the  
421 vulva go into a more relaxed state (Collins et al., 2016; Collins & Koelle, 2013). We now interpret  
422 this phasing of egg release with locomotion as evidence that vulval muscle  $Ca^{2+}$  activity drives  
423 contraction, but the vulva only opens for successful egg release when contraction is initiated  
424 during relaxation of the adjacent body wall muscles. Together, these results show that  
425 optogenetic stimulation of the vulval muscles is sufficient to induce vulval muscle  $Ca^{2+}$  activity  
426 and contraction for egg release.

427 To test the hypothesis that the VCs respond to vulval muscle activation, we recorded  
428 changes in VC  $Ca^{2+}$  upon optogenetic stimulation of the vulval muscles (Figure 7D). We  
429 observed a robust induction of VC  $Ca^{2+}$  activity upon blue light illumination (Figures 7E and 7F).  
430 The rise in VC  $Ca^{2+}$  occurred before the first egg-laying event, suggesting that this process is  
431 dependent on muscle activity and not necessarily the passage of an egg (Figure 7G; Movie 7).

432 This result demonstrates that the VCs can become excited in response to activity of the  
433 postsynaptic vulval muscles. What is the mechanism for VC activation by the vulval muscles?  
434 The VCs make both chemical and electrical synapses on vulval muscles (Cook et al., 2019;  
435 White et al., 1986). Depolarization of the vulval muscles might be expected to electrically  
436 propagate to the VC and trigger an increase in VC  $\text{Ca}^{2+}$  activity. Another possibility is that the  
437 VCs are mechanically activated in response to vulval muscle contraction and/or vulval opening.  
438 To test these alternate models, we optogenetically stimulated the vulval muscles of *unc-54*  
439 muscle myosin mutants, which are unable to contract their muscles, and recorded VC  $\text{Ca}^{2+}$   
440 activity (Figure 7D; Movie 8). We found optogenetic activation of the vulval muscles failed to  
441 induce VC  $\text{Ca}^{2+}$  activity in *unc-54* mutants compared to the wild-type background (Figures 7G  
442 and 7H). While *unc-54* mutants appear to show some increase in VC  $\text{Ca}^{2+}$  activity following blue  
443 light stimulation of the vulval muscles, this increase was not statistically significant, suggesting  
444 indirect excitation of the VCs through gap junctions is insufficient on its own to induce robust VC  
445  $\text{Ca}^{2+}$  activity. Together, these results support a model where the VC neurons are mechanically  
446 activated in response to vulval muscle contraction. Mechanical activation appears to drive VC  
447 activity and is mediated through the VC4 and VC5 neurites which are most proximal to the vm2  
448 vulval muscles and vulval canal through which eggs are laid. Following this mechanical  
449 activation step, excitation of vulva-proximal VCs may lead to the cross-stimulation of the more  
450 distal VC neurons to coordinate locomotion and body posture during egg-laying behavior.

451

452

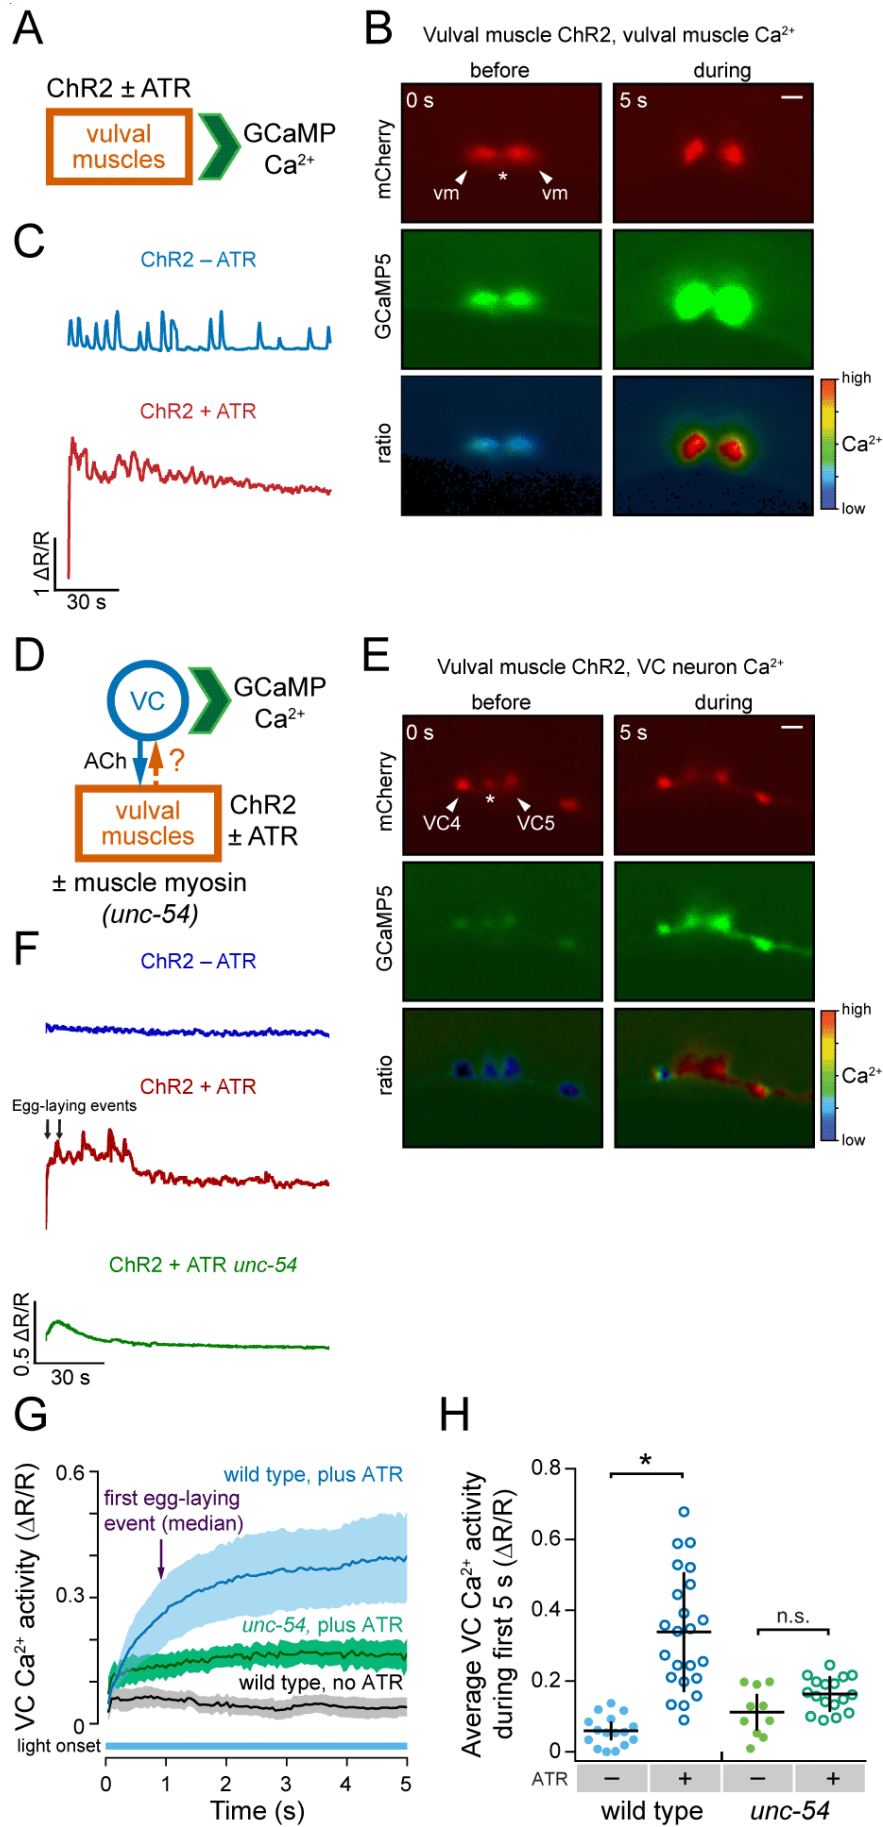



454 **Figure 7. Optogenetic activation and contraction of the vulval muscles drives VC neuron**  
455 **activity.**

456 **(A)** Cartoon of experiment. Channelrhodopsin-2 and GCaMP5 were expressed in the vulval  
457 muscles to monitor cytosolic  $Ca^{2+}$  after optogenetic stimulation. **(B)** Representative still images  
458 of vulval muscle mCherry, GCaMP5, and GCaMP5/mCherry ratio during optogenetic activation  
459 of the vulval muscles. Arrowheads indicate each vulval muscle half, and asterisk indicates vulva.  
460 Scale bar is 20  $\mu$ m. **(C)** Representative traces of vulval muscle GCaMP5/mCherry  $Ca^{2+}$  ratio  
461 ( $\Delta R/R$ ) in animals expressing ChR2 in the vulval muscles in the absence (-ATR, top) or presence  
462 (+ATR, bottom) of all-*trans* retinal during 3 minutes of continuous blue light exposure. **(D)**  
463 Cartoon of circuit and experiment. Channelrhodopsin-2 was expressed in the vulval muscles and  
464 GCaMP5 was expressed in the VC neurons to record  $Ca^{2+}$  activity in wild-type or *unc-54* myosin  
465 null mutant animals. **(E)** Representative still images of VC neuron mCherry, GCaMP5, and  
466 GCaMP5/mCherry ratio during optogenetic activation of the vulval muscles. Arrowheads indicate  
467 VC neuron cell bodies, and asterisk indicates vulva. Scale bar is 20  $\mu$ m. **(F)** Representative  
468 traces of VC neuron GCaMP5/mCherry  $Ca^{2+}$  ratio ( $\Delta R/R$ ) in animals expressing ChR2 in the  
469 vulval muscles in the absence (-ATR, top) or presence (+ATR, bottom) of all-*trans* retinal during  
470 3 minutes of continuous blue light exposure. **(G)** Averaged VC  $Ca^{2+}$  responses during the first 5  
471 s. Error bands represent  $\pm 95$  confidence intervals for the mean. **(H)** Scatter plot showing the  
472 average VC  $Ca^{2+}$  response during the first 5 seconds of optogenetic stimulation of the vulval  
473 muscles. Asterisk indicates  $p < 0.0001$ ; n.s. indicates  $p > 0.05$  (one-way ANOVA with Bonferroni's  
474 correction for multiple comparisons).

475

476

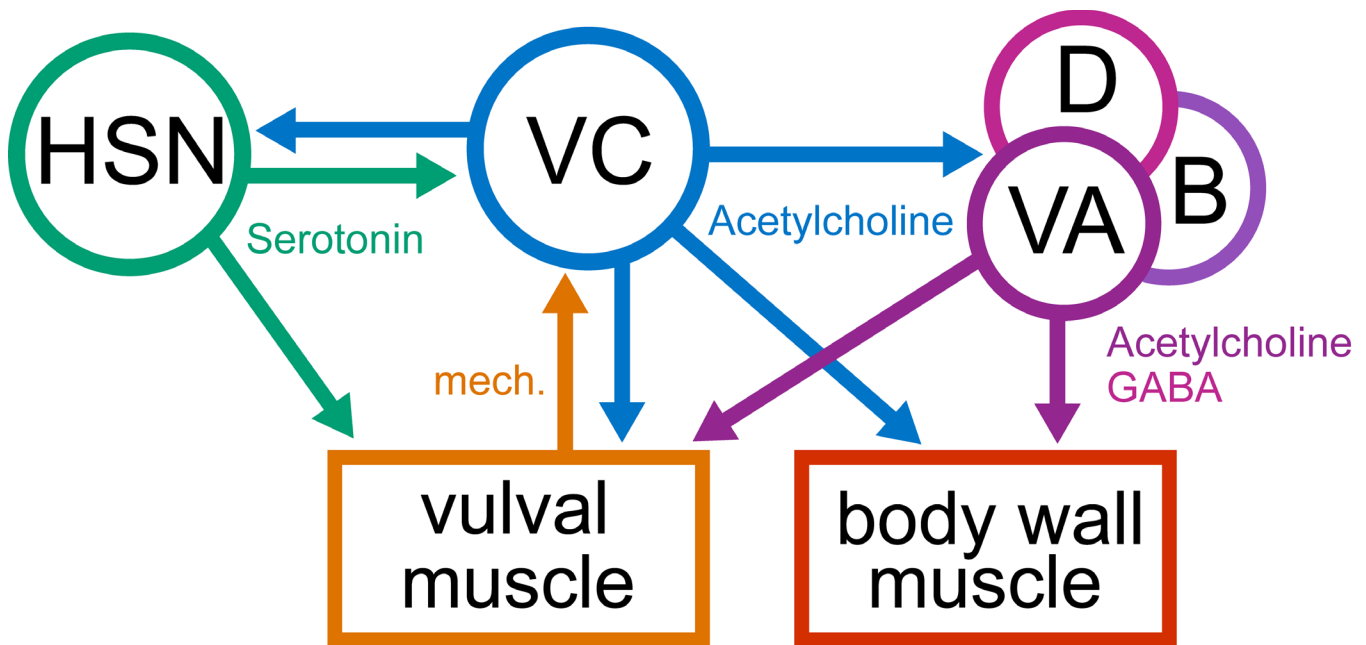

477

478 **Figure 8. The VC neurons function to coordinate synchronized contraction of the vulval**  
479 **muscles for egg laying in response to serotonin-mediated potentiation.**

480

#### 481 **Discussion**

482 The connectome of *C. elegans* has greatly informed neural circuit studies and has revealed  
483 that connectivity alone is not sufficient to explain nervous system operations (Bargmann, 2012;  
484 Bentley et al., 2016). In the present study, we examined the neural circuit driving egg-laying  
485 behavior in *C. elegans* at a cellular resolution to reveal functional pathways and elements of the  
486 behavior that had not been discernable through connectome or prior genetic studies (Figure 8).  
487 We show that serotonin promotes egg laying in a way that requires the hermaphrodite-specific,  
488 cholinergic VC motoneurons. The hermaphrodite-specific HSN command neurons have  
489 previously been shown to be the primary source of serotonin within the egg-laying circuit and  
490 make synapses onto both the VCs and vulval muscles (Cook et al., 2019; Waggoner et al., 1998;  
491 White et al., 1986). Our data shows that HSN activity acts to excite the vulval muscles and VCs,  
492 and that VC  $Ca^{2+}$  activity is closely associated with visible vulval muscle contraction. In the

493 absence of HSN-mediated potentiation, the VCs are able to excite the vulval muscles, but not to  
494 the threshold required for egg laying. This sub-threshold interaction is consistent with a model  
495 where serotonin-mediated potentiation of the VCs and/or vulval muscles is required before the  
496 VCs can facilitate egg laying through timely excitatory input. In the absence of VC  
497 neurotransmission, the HSN command neurons and the vulval muscles show excess  $Ca^{2+}$   
498 activity, but this excess activity does not correspond to increased egg laying. Instead, we find  
499 that the vulval muscles are less efficient at opening the vulva, indicating the VCs have a role in  
500 facilitating vulval muscle contraction. We thus interpret the excess HSN and vulval muscle  
501 activity as a natural consequence of egg-laying circuit activity without feedback of successful  
502 egg release (Collins et al., 2016). Surprisingly, optogenetic activation and contraction of the  
503 postsynaptic vulval muscles is sufficient to drive presynaptic VC  $Ca^{2+}$  activity. We propose that  
504 serotonin released from the HSNs signals to promote both vulval muscle contractility and VC  
505 sensitivity to that contraction. Following this potentiation, vulval muscle twitch contractions are  
506 able to mechanically activate the VCs to release excitatory acetylcholine as part of a positive-  
507 feedback loop until the vulval muscles are fully contracted and egg laying occurs.

508 The physiological basis for the distinction between vulval muscle twitching, egg-laying  
509 events, and failed egg-laying events may result from different presynaptic inputs (Collins &  
510 Koelle, 2013; Cook et al., 2019; White et al., 1986). Twitching is limited to  $Ca^{2+}$  activity in the  
511 vm1 vulval muscles and occurs at a similar phase of locomotion as egg laying (Collins & Koelle,  
512 2013). The vm1 muscles receive synaptic input from single Ventral Type A and Type B (VA and  
513 VB, respectively) motor neurons (Figure 8; Cook et al., 2019; White et al., 1986). The VA and  
514 VB motor neurons are part of the locomotion circuit that drive forward and reverse locomotion,  
515 respectively, suggesting they may signal to coordinate egg-laying and locomotion behaviors  
516 (Collins et al., 2016; Hardaker et al., 2001; Zhen & Samuel, 2015). The vm2 vulval muscles

517 receive synaptic input from the HSN and VC neurons (Cook et al., 2019; White et al., 1986), and  
518 synaptic input from the HSNs onto the vm2 muscles helps coordinate anterior and posterior  
519 muscle contraction (Li et al., 2013). The VCs also regulate locomotion, potentially through the  
520 GABAergic motor neurons or via direct release of ACh that drives excitation and contraction of  
521 the body wall muscles to slow locomotion (Figure 8; Collins et al., 2016). Slowing of locomotion  
522 before egg laying may provide time for the vulval muscles to fully contract (Collins et al., 2016;  
523 Collins & Koelle, 2013). This slowing appears to hold the animal in a body posture that is  
524 favorable for vulval opening and egg release, which would be consistent with our finding that VC  
525 activity causes elongated vulval muscle  $Ca^{2+}$  twitch transients (Figure 3). In this role, the VCs  
526 would be signaling to the rest of the egg-laying circuit and locomotion circuit that the vulva is  
527 open so that body posture can be held in a favorable phase for egg release. Failed egg-laying  
528 events could occur because of disrupted phasing of the locomotion pattern with activity in the  
529 egg-laying circuit. Since twitches and egg-laying events occur at a specific phase of the  
530 locomotion pattern, the opening of the vulva and egg release may require not only coordinated  
531 muscle contraction, but also the relaxation of immediately proximal body wall muscles so that  
532 they cannot physically resist the opening of the vulva. Thus, the VCs may act in timing the  
533 excitation of the vm2 muscles in relation to excitatory input from the VAVB locomotion motor  
534 neurons onto the vm1 muscles, facilitating full contraction and egg laying in phase with  
535 locomotion.

536 Why are the VCs required for serotonin-induced egg laying? Serotonin is released by the  
537 HSN command neurons along with NLP-3 neuropeptides to initiate the active phase of egg-  
538 laying behavior (Brewer et al., 2019; Collins et al., 2016; Shyn et al., 2003; Waggoner et al.,  
539 1998). Serotonin signals through several G-protein coupled receptors including the 5-HT<sub>1c</sub>  
540 ortholog SER-1 and the 5-HT<sub>7</sub> ortholog SER-7 expressed on the vulval muscles (Hapiak et al.,

541 2009; Hobson et al., 2006; Xiao et al., 2006). These serotonin receptors are thought to act  
542 through  $G_{\alpha_q}$  and  $G_{\alpha_s}$  signaling pathways, respectively, which activate EGL-19 L-type voltage-  
543 gated  $Ca^{2+}$  channels in the vulval muscles to enhance their response to other excitatory input  
544 (Schafer, 2006; Waggoner et al., 1998; Zhang et al., 2008). Serotonin acting through SER-7 has  
545 previously been shown to initiate neural circuit activity, such as in feeding behavior (Song et al.,  
546 2013). SER-7 is also expressed in the VC neurons (Fernandez et al., 2020), and serotonin  
547 stimulates VC  $Ca^{2+}$  activity (Zhang et al., 2008). Similar to animals where VC neurotransmitter  
548 release is blocked, *ser-7* mutants also fail to respond to exogenous serotonin (Hobson et al.,  
549 2006). Targets of serotonin within the VCs may include N/P/Q-type  $Ca^{2+}$  channels such as UNC-  
550 2 which promote neurotransmitter release (Schafer et al., 1996). Following serotonergic  
551 potentiation, the VCs may be close enough to threshold to become mechanically excited in  
552 response to vm1-mediated vulval muscle twitches, leading to excitatory neurotransmitter release  
553 onto the vm2 vulval muscles to drive complete vulval muscle contraction for egg release.

554 Many behaviors require retrograde feedback to help fine-tune movements and make  
555 adjustments based on the changing internal and external environment, such as with wing-beat  
556 patterns in *Drosophila* or head-eye coordination in humans (Bartussek & Lehmann, 2016; Fang  
557 et al., 2015). We find that the downstream target of the egg-laying neural circuit, the vulval  
558 muscles, signals upstream to facilitate proper completion of the behavior. We postulate that such  
559 retrograde signaling is critical for two reasons. First, it can act to feedback inhibit the circuit to  
560 signal when the behavior has been executed. We find that vulval muscle contraction activates  
561 the VCs, which may inhibit the egg-laying circuit through release of acetylcholine acting on  
562 metabotropic receptors such as GAR-2 on the HSNs, vulval muscles, and uv1 cells (Bany et al.,  
563 2003; Fernandez et al., 2020; Zhang et al., 2008, 2010). GAR-2 has been shown to act in parallel  
564 with ionotropic receptors to differentially modulate locomotion behavior, providing both short-

565 and longer-term effects in response to cholinergic signaling (Dittman & Kaplan, 2008). Second,  
566 retrograde signaling can create a feed-forward excitation to facilitate full execution of a behavior.  
567 In this circuit model, HSN command neuron signaling potentiates the excitatory VCs to help  
568 ensure vulval muscle twitches are converted into full egg-laying contractions. This type of feed-  
569 forward activity has been demonstrated in the SMDD neurons in which the TRPC channels,  
570 TRP-1 and TRP-2, are mechanically activated by neck muscle contractions to influence neck  
571 steering behavior (Yeon et al., 2018). How the VC neurons are mechanically activated is still  
572 unclear, but the VCs do express innexin gap junction proteins (Altun et al., 2009) that have  
573 recently been shown to respond to mechanical activation as hemichannels (Walker & Schafer,  
574 2020).

575 In all, the VC neurons and the egg-laying circuit present a unique model system for  
576 investigating how different forms of feedback work together to drive a robust behavior. The  
577 elucidation of the cellular and molecular mechanisms underlying these distinct forms of feedback  
578 could help the understanding of human neurological diseases where muscle coordination and  
579 proprioception are dysregulated, such as in Parkinson's and Huntington disease (Bargmann,  
580 2012; Lukos et al., 2013).

581

582 **Movie 1. GCaMP5/mCherry ratio recording of VC Ca<sup>2+</sup> activity during the egg-laying active**  
583 **state.**

584 Ratio of GCaMP5 and mCherry fluorescence in the VC neurons mapped onto a false color  
585 spectrum ranging from blue (low Ca<sup>2+</sup>) to red (high Ca<sup>2+</sup>). The VC neurons show high Ca<sup>2+</sup>  
586 activity and physical displacement as the vulval muscles contract and an egg passes through  
587 the vulva to be laid. The Ca<sup>2+</sup> activity then returns to a low level until a vulval muscle twitch  
588 occurs (0:09) followed by another egg-laying event.

589

590 **Movie 2. GCaMP5/mCherry ratio recording of VC Ca<sup>2+</sup> activity in response to optogenetic**  
591 **stimulation of the HSNs.**

592 Ratio of GCaMP5 and mCherry fluorescence in the VC neurons mapped onto a false color  
593 spectrum ranging from blue (low Ca<sup>2+</sup>) to red (high Ca<sup>2+</sup>). Optogenetic activation of the HSN  
594 neurons initiates an egg-laying active state, which results in high VC Ca<sup>2+</sup> transients (red), vulval  
595 muscle twitches, and egg laying. The VC Ca<sup>2+</sup> returns to low activity (blue) in between twitch  
596 and egg-laying instances.

597

598 **Movie 3. GCaMP5/mCherry ratio recording of vulval muscle Ca<sup>2+</sup> in response to**  
599 **optogenetic stimulation of the VCs.**

600 Ratio of GCaMP5 and mCherry fluorescence in the vulval muscles mapped onto a false color  
601 spectrum ranging from blue (low Ca<sup>2+</sup>) to red (high Ca<sup>2+</sup>). Optogenetic activation of the VC  
602 neurons induces vulval muscle Ca<sup>2+</sup> activity and twitches, but not egg laying.

603

604 **Movie 4. GCaMP5/mCherry ratio recording of vulval muscle Ca<sup>2+</sup> during the egg-laying**  
605 **active state when synaptic transmission from the VC neurons is blocked by Tetanus**  
606 **Toxin.**

607 Ratio of GCaMP5 and mCherry fluorescence in the vulval muscles mapped onto a false color  
608 spectrum ranging from blue (low Ca<sup>2+</sup>) to red (high Ca<sup>2+</sup>). The vulval muscles still exhibit twitches  
609 and egg-laying events but will also frequently fail to lay eggs in response to high Ca<sup>2+</sup> activity,  
610 termed “failed egg-laying events”.

611

612 **Movie 5. GCaMP5/mCherry ratio recording of vulval muscle Ca<sup>2+</sup> in response to**  
613 **optogenetic stimulation of the vulval muscles.**

614 Ratio of GCaMP5 and mCherry fluorescence in the vulval muscles mapped onto a false color  
615 spectrum ranging from blue (low Ca<sup>2+</sup>) to red (high Ca<sup>2+</sup>). Optogenetic activation of the vulval  
616 muscles induces immediate and sustained vulval muscle contraction, high Ca<sup>2+</sup> activity, and  
617 periodic egg-laying events.

618

619 **Movie 6. Brightfield recording of vulval opening and egg laying in response to**  
620 **optogenetic stimulation of the vulval muscles.**

621 Brightfield recording of egg laying in response to optogenetic vulval muscle activation.  
622 Optogenetic activation of the vulval muscles induces tetanic vulval muscle contraction, but vulval  
623 opening and egg release remains phased with the body bends of locomotion.

624

625 **Movie 7. GCaMP5/mCherry ratio recording of VC Ca<sup>2+</sup> in response to optogenetic**  
626 **stimulation of the vulval muscles.**

627 Ratio of GCaMP5 and mCherry fluorescence in the VCs mapped onto a false color spectrum  
628 ranging from blue (low) to red (high). Optogenetic activation of the vulval muscles causes an  
629 immediate induction of VC Ca<sup>2+</sup> activity that remains at a high level for the duration of the  
630 stimulation.

631

632 **Movie 8. GCaMP5/mCherry ratio recording of VC Ca<sup>2+</sup> during optogenetic vulval muscle**  
633 **activation in an *unc-54* myosin mutant background.**

634 Ratio of GCaMP5 and mCherry fluorescence in the VCs mapped onto a false color spectrum  
635 ranging from blue (low Ca<sup>2+</sup>) to red (high Ca<sup>2+</sup>). Optogenetic activation of the vulval muscles  
636 induces immediate but greatly diminished VC Ca<sup>2+</sup> activity compared to otherwise wild-type  
637 animals.

638

639



## 640 **Materials & Methods**

### 641 **Nematode culture and strains**

642 All *C. elegans* strains were maintained at 20 °C on Nematode Growth Medium (NGM) agar  
643 plates seeded with OP50 *E. coli* as described (Brenner, 1974). All assays were conducted on  
644 age-matched adult hermaphrodites at 24-30 h past the late L4 stage, unless otherwise stated.  
645 A list of all strains generated and used in this study can be found in Table 1.

646

### 647 **Plasmid and strain construction**

648 Oligonucleotides were synthesized by IDT-DNA. PCR was performed using high-fidelity Phusion  
649 DNA polymerase (New England Biolabs) except for routine genotyping which was performed  
650 using standard Taq DNA polymerase. Plasmids were prepared using a Qiagen miniprep spin kit.  
651 DNA concentrations were determined using a Nano-Drop spectrophotometer.

652

#### 653 *Tetanus toxin (TeTx)-expressing transgenes:*

654 VC neuron TeTx –<sub>A</sub> ~1.4 kB DNA fragment encoding Tetanus Toxin was cut from pAJ49 (Jose  
655 et al., 2007) with AgeI/XhoI, and ligated into a similarly digested pKMC145 [*lin-11::GFP::unc-54*  
656 *3' UTR*] to generate pKMC282 [*lin-11::TeTx::unc-54 3' UTR*]. pKMC282 (50 ng/μl) was injected  
657 along with pL15EK (50 ng/μl; (Clark et al., 1994)) into LX1832 *lite-1(ce314) lin-15(n765ts) X*  
658 generating four independent transgenic lines of which one, MIA113 *keyEx32 [lin-11::TeTx::unc-*  
659 *54 3'UTR + lin-15(+)]*; *lite-1(ce314) lin-15(n765ts) X*, was used for integration. *keyEx32* was  
660 integrated with UV/TMP generating three independent integrants *keyIs32-33* and *keyIs46 [lin-*  
661 *11::TeTx::unc-54 3'UTR + lin-15(+)]*. Each transgenic line was backcrossed six times to LX1832  
662 generating strains MIA144-146. All transgenic strains appeared phenotypically similar, and

663 MIA144 and MIA146 were used for experiments and further crosses. To eliminate HSNs in  
664 animals lacking VC synaptic transmission, MIA26 *egl-1(n986dm) V* mutant animals were  
665 crossed with MIA146 to generate MIA173 *keyIs46; egl-1(n986dm) V; lite-1(ce314) lin-15(n765ts)*  
666 X.

667

668 *Histamine-gated chloride channel (HisCl)-expressing transgenes:*

669 VC neuron HisCl – The ~1.3 kB DNA fragment encoding *Drosophila* histamine-gated chloride  
670 channel HisCl1 was PCR amplified from pNP403 (Pokala et al., 2014) using the oligonucleotides  
671 5'-GCG CCC GGG GTA GAA AAA ATG CAA AGC CCA ACT AGC AAA TTG G-3' and 5'-GCG  
672 GAG CTC TTA TCA TAG GAA CGT TGT CCA ATA GAC AAT A-3', cut with XmaI/SacI, and  
673 ligated into Agel/SacI-digested pKMC145 to generate pAB2 [*lin-11::HisCl::unc-54 3'UTR*]. pAB2  
674 (20 ng/μl) was injected into LX1832 along with pL15EK (50 ng/μl), generating the  
675 extrachromosomal line MIA93 *keyEx24 [lin-11::HisCl::unc-54 3'UTR + lin-15(+)]*; *lite-1(ce314)*  
676 *lin-15(n765ts)* X. The extrachromosomal transgene subsequently integrated using UV/TMP to  
677 generate the transgenes *keyIs23-30 [lin-11::HisCl::unc-54 3'UTR + lin-15(+)]*. Strains bearing  
678 these transgenes were then backcrossed to the LX1832 parent strain six times, generating  
679 strains MIA124, MIA125, MIA130, MIA131, and MIA132. All transgenic strains appeared  
680 phenotypically similar, and MIA125 was used for experiments and further crosses. To eliminate  
681 the HSN neurons in animals expressing HisCl in the VC neurons, MIA125 *keyIs23; lite-1(ce314)*  
682 *lin-15(n765ts)* X was crossed with MIA26 to generate MIA176 *keyIs23; egl-1(n986dm); lite-*  
683 *1(ce314) lin-15(n765ts)* X.

684

685 *Channelrhodopsin-2 (ChR2)-expressing transgenes:*

686 Vulval muscle ChR2 – To express ChR2 in the vulval muscles, the ~1 kB DNA fragment  
687 encoding for ChR2 was PCR amplified from pRK7 [*del-1::ChR2(H34R/T159C)::unc-54 3' UTR*]  
688 using oligonucleotides 5'-GCG GCT AGC ATG GAT TAT GGA GGC GCC CTG-3' and 5'-GCG  
689 GGT ACC TCA GGT GGC CGC GGG GAC CGC GCC AGC CTC GGC C-3'. The amplicon and  
690 recipient plasmid, pBR3 (Ravi, Garcia, et al., 2018), were digested with NheI/KpnI, generating  
691 pRK11 [*ceh-24::ChR2(H34R/T159C)::unc-54 3' UTR*]. pRK11 (50 ng/μl) was injected into  
692 LX1832 along with pL15EK (50 ng/μl) generating MIA212 *keyEx43* [*ceh-*  
693 *24::ChR2(H34R/T159C)::unc-54 3'UTR + lin-15(+)*] which was subsequently integrated with  
694 UV/TMP, generating five independent integrated transgenes *keyIs47-51*. Strains carrying these  
695 integrated transgenes were then backcrossed to the LX1832 parent strain six times, generating  
696 the strains MIA229-232 and MIA242. All transgenic strains were phenotypically similar, and  
697 MIA229 was used for experiments and further crosses.

698 VC ChR2 – The allele *keyIs3* was used to express ChR2 in the VC neurons under a modified  
699 *lin-11* promoter, as previously described (Collins et al., 2016).

700 HSN ChR2 – The allele *wzIs30* was used to express ChR2 in the HSN neurons under the *egl-6*  
701 promoter, as previously described (Collins et al., 2016; Emtage et al., 2012).

702

703 *Calcium reporter transgenes:*

704 Vulval muscle GCaMP5 – Vulval muscle Ca<sup>2+</sup> activity was visualized using the strain LX1918  
705 which co-expresses GCaMP5 and mCherry in the vulval muscles from the *unc-103e* promoter  
706 (Collins et al., 2016). To analyze vulval muscle Ca<sup>2+</sup> activity in animals where VC synaptic  
707 transmission was blocked with Tetanus Toxin, LX1918 was crossed with MIA144 to generate  
708 MIA183 *keyIs33; vsIs164 lite-1(ce314) lin-15(n765ts) X*. To analyze vulval muscle Ca<sup>2+</sup> activity

709 in animals where the VC neurons could be optogenetically activated by ChR2, LX1918 was  
710 crossed with MIA3 (Collins et al., 2016), to generate MIA221 *keyIs3; vsIs164 lite-1(ce314) lin-*  
711 *15(n765ts) X*. To analyze vulval muscle Ca<sup>2+</sup> activity in animals where the vulval muscles could  
712 be optogenetically activated by ChR2, LX1918 was crossed with MIA229 to generate MIA250  
713 *keyIs49; vsIs164 lite-1(ce314) lin-15(n765ts) X*.

714 VC neuron GCaMP5 – VC neuron Ca<sup>2+</sup> activity was visualized using the strain LX1960 which  
715 co-expresses GCaMP5 and mCherry in the VC neurons (Collins et al., 2016). To visualize VC  
716 activity during optogenetic stimulation of the HSNs, the strain LX1970 was used (Collins et al.,  
717 2016). To visualize VC activity after optogenetic stimulation of the vulval muscles, LX1960 was  
718 crossed with MIA229 to generate MIA241 *vsIs172; keyIs48 lite-1(ce314) lin-15(n765ts) X*. To  
719 visualize VC activity after optogenetic stimulation of the vulval muscles when muscle contraction  
720 is impaired, CB190 *unc-54(e190) I* myosin heavy chain null mutants were crossed with LX1832  
721 to generate MIA274 *unc-54(e190) I; lite-1(ce314) lin-15(n765ts) X*. MIA274 was then crossed  
722 with MIA241 to generate MIA298 *keyIs48; vsIs172; unc-54(e190) I; lite-1(ce314) lin-15(n765ts)*  
723 *X*.

724 HSN neuron GCaMP5 – HSN neuron Ca<sup>2+</sup> activity was visualized using the strain LX2004 which  
725 co-expresses GCaMP5 and mCherry in the HSN neurons (Collins et al., 2016). To visualize HSN  
726 Ca<sup>2+</sup> after neurotransmission from the VC neurons is blocked by Tetanus Toxin, LX2004 was  
727 crossed with MIA144 to generate MIA217 *keyIs33; vsIs183 lite-1(ce314) lin-15(n765ts) X*.

728

## 729 **Ratiometric Ca<sup>2+</sup> imaging**

730 Ratiometric Ca<sup>2+</sup> imaging of the vulval muscles and VC neurons in freely behaving animals was  
731 performed as previously described methods (Ravi, Nassar, et al., 2018). Late L4 hermaphrodites

732 were staged and then imaged 24 h later by being moved to an NGM agar chunk and a glass  
733 coverslip being placed over. Animals were recorded on a Zeiss Axio Observer.Z1 inverted  
734 compound microscope with a 20X 0.8NA Apochromat objective. Brightfield recordings of  
735 behavior was recorded with infrared illumination using a FLIR Grasshopper 3 CMOS camera  
736 after 2x2 binning using FlyCap software. Colibri.2 470 nm and 590 nm LEDs were used to co-  
737 excite GCaMP5 and mCherry fluorescence which was captured at 20 Hz onto a Hamamatsu  
738 ORCA Flash-4.0V2 sCMOS camera after channel separation using a Gemini image splitter. A  
739 custom script in Bonsai was used to measure stage position at each frame of the recording which  
740 was added to centroid position of the fluorescence object to measure animal speed in Ca<sup>2+</sup>  
741 imaging experiments (Lopes et al., 2015; Ravi, Nassar, et al., 2018). Each animal was recorded  
742 until it entered an active egg-laying phase (up to 1 h), after which a 10-minute segment centered  
743 around the onset of egg laying was extracted from the full recording for analysis. Two-channel  
744 fluorescence (GCaMP5/mCherry) image sequences were processed and analyzed in Fiji  
745 (Schindelin et al., 2012), Volocity (PerkinElmer), and a custom script for MATLAB (MathWorks)  
746 as previously described (Ravi, Nassar, et al., 2018).

747 Ratiometric Ca<sup>2+</sup> imaging of the HSN neurons in freely behaving animals was performed as  
748 previously described (Ravi, Garcia, et al., 2018). Late L4 hermaphrodites were staged and then  
749 imaged 24 h later by being moved to an NGM agar chunk and a glass coverslip being placed  
750 over. Animals were recorded on an inverted Leica TCS SP5 confocal microscope with a 20X  
751 0.7NA Apochromat objective. 488 nm and 561 nm laser lines were used to co-excite GCaMP5  
752 and mCherry fluorescence, respectively.

753

754 **Electrical silencing using HisCI**

755 Acute electrical silencing with histamine was performed as previously described (Pokala et al.,  
756 2014; Ravi, Garcia, et al., 2018). Animals were moved onto OP50-seeded NGM agar plates that  
757 contained either 0 mM or 10 mM histamine for four hours before the experiment.

758

### 759 **Egg-laying behavior assays**

760 The steady-state accumulation of eggs in the uterus was determined as previously described  
761 (Koelle & Horvitz, 1996). Briefly, late L4 hermaphrodites were staged onto OP50-seeded plates  
762 and grown at 20 °C for 30 h after which a single adult was placed into a 7 ul drop of 20% sodium  
763 hypochlorite (bleach) solution. The eggs, which are resistant to bleach, were then counted using  
764 a dissecting microscope. The timing of the first egg laid was assayed by staging a young adult  
765 (within 30 minutes of L4 to adult molt) animal onto an NGM agar plate with food and checking  
766 every following 30 minutes for the presence of an egg on the plate (Ravi, Garcia, et al., 2018).

767 Egg laying in liquid in response to exogenous serotonin was performed as described (Banerjee  
768 et al., 2017; Trent et al., 1983). Late L4 hermaphrodites were staged onto OP50-seed plates  
769 and grown at 20 °C for 24 h. Adult animals were placed singly into either 100 ul M9 buffer only  
770 or M9 buffer containing 18.5 mM serotonin creatinine sulfate salt (Sigma-Aldrich) in a 96-well  
771 microtiter dish. The number of eggs laid by each animal after 1 hour were then counted. Egg  
772 laying on plates in response to exogenous serotonin was performed on NGM agar infused with  
773 18.5 mM serotonin creatine sulfate salt (Sigma-Aldrich). 3 animals were placed on each NGM  
774 agar plate and the number of eggs laid was counted after 1 hour and divided by 3 to calculate  
775 an average-animal response per plate.

776

### 777 **Optogenetics**

778 Optogenetic experiments with Channelrhodopsin-2 (ChR2) were performed using a Zeiss Axio  
779 Observer.Z1 inverted compound microscope as previously described (Collins et al., 2016). ChR2  
780 was excited in freely behaving animals using a 470 nm (blue) LED. Late L4 animals were staged  
781 onto NGM agar plates seeded with *E. coli* OP50 bacterial cultures containing either 0.4 mM all-  
782 *trans* retinal (ATR) or no ATR 24 h prior to the start of the experiment. Animals were then  
783 continuously illuminated with blue light for 3-5 minutes and the locomotion behavior and number  
784 of egg-laying events were recorded. For experiments combining optogenetics with ratiometric  
785  $Ca^{2+}$  imaging, the blue light would excite both the ChR2 and GCaMP5 fluorescence  
786 simultaneously. Blue light intensity was chosen based on both optimal settings to observe robust  
787 ChR2-activation and GCaMP5 fluorescence. Animals were excluded from a dataset if they  
788 entered an active egg-laying state before the onset of blue light stimulation (one animal in total  
789 across all experiments).

790

## 791 **Statistical analysis**

792 All data were analyzed using GraphPad Prism 8. Steady-state egg accumulation and timing of  
793 first egg laid assays were compared using a one-way ANOVA with Bonferroni's correction for  
794 multiple comparisons. Serotonin-induced egg laying assays were compared using either a  
795 Kruskal-Wallis test with Dunn's correction for multiple comparisons (in buffer with individual  
796 responses) or a one-way ANOVA with Bonferroni's correction for multiple comparisons (on  
797 plates with averaged responses). Frequencies of inter-transient intervals were analyzed using  
798 either a Kolmogorov-Smirnov test or Kruskal-Wallis test with Dunn's correction for multiple  
799 comparisons. Proportion of failed egg-laying events was analyzed using a Mann-Whitney test.  
800  $Ca^{2+}$  imaging analyses of amplitude, transient peak amplitude, inter-transient interval, or

801 transient widths were compared using either a Student's t test or a one-way ANOVA with  
802 Bonferroni's correction for multiple comparisons.

803

804 **Acknowledgements**

805 This work was funded by grants from the NIH (R01-NS086932) and NSF (IOS-1844657) to KMC.  
806 RJK 3<sup>rd</sup> was supported by a University of Miami Maytag Fellowship. We thank David M. Miller III  
807 for sharing plasmids. Some of the strains used in this study were provided by the *C.*  
808 *elegans* Genetics Center, which is funded by NIH Office of Research Infrastructure Programs  
809 (P40 OD010440). We thank Drs. Julia Dallman, Grace Zhai, Mason Klein, and members of the  
810 Collins lab for helpful discussions and feedback on the manuscript.

811



812 **Table 1. Strain names and genotypes for all animals used in this study.**

| Strain | Genotype                                                        | Feature                                                                                                | Reference                    |
|--------|-----------------------------------------------------------------|--------------------------------------------------------------------------------------------------------|------------------------------|
| CB190  | <i>unc-54(e190) I</i>                                           | Myosin heavy chain null mutant                                                                         | (Brenner, 1974)              |
| LX1832 | <i>lite-1(ce314) X lin-15(n765ts) X</i>                         | Blue light-resistant (optogenetics and Ca <sup>2+</sup> imaging), multivulva (injection rescue marker) | (Collins & Koelle, 2013)     |
| LX1918 | <i>vsIs164 lite-1(ce314) lin-15(n765ts) X</i>                   | Vulval muscles expressing GCaMP5, mCherry                                                              | (Collins et al., 2016)       |
| LX1960 | <i>vsIs172; lite-1(ce314) lin-15(n765ts) X</i>                  | VC GCaMP5, mCherry                                                                                     | (Collins et al., 2016)       |
| LX2004 | <i>vsIs183 lite-1(ce314) lin-15(n765ts) X</i>                   | HSN expressing GCaMP5, mCherry                                                                         | (Collins et al., 2016)       |
| MIA116 | <i>keyIs21; lite-1(ce314) lin-15(n765ts) X</i>                  | HSN HisCl                                                                                              | (Ravi, Garcia, et al., 2018) |
| MIA123 | <i>egl-1(n986dm) V lite-1(ce314) lin-15(n765ts) X</i>           | No HSNs                                                                                                | this study                   |
| MIA125 | <i>keyIs23; lite-1(ce314) lin-15(n765ts) X</i>                  | VC HisCl                                                                                               | this study                   |
| MIA144 | <i>keyIs33; lite-1(ce314) lin-15(n765ts) X</i>                  | VC Tetanus Toxin                                                                                       | this study                   |
| MIA146 | <i>keyIs46; lite-1(ce314) lin-15(n765ts) X</i>                  | VC Tetanus Toxin                                                                                       | this study                   |
| MIA173 | <i>keyIs46; egl-1(n986dm) V lite-1(ce314) lin-15(n765ts) X</i>  | VC Tetanus Toxin; no HSNs                                                                              | this study                   |
| MIA176 | <i>keyIs23; egl-1(n986dm) V; lite-1(ce314) lin-15(n765ts) X</i> | VC HisCl; no HSNs                                                                                      | this study                   |
| MIA183 | <i>keyIs33; vsIs164 lite-1(ce314) lin-15(n765ts) X</i>          | VC Tetanus Toxin; vulval muscle GCaMP5, mCherry                                                        | this study                   |
| MIA217 | <i>keyI33; vsIs183 lite-1(ce314) lin-15(n765ts) X</i>           | VC Tetanus Toxin; HSN GCaMP5, mCherry                                                                  | this study                   |
| MIA221 | <i>keyIs3; vsIs164; lite-1(ce314) lin-15(n765ts) X</i>          | VC Channelrhodopsin -2; vulval muscle GCaMP5, mCherry                                                  | this study                   |
| MIA229 | <i>keyIs48; lite-1(ce314) lin-15(n765ts) X</i>                  | Vulval muscle Channelrhodopsin -2                                                                      | this study                   |
| MIA241 | <i>keyIs48; vsIs172; lite-1(ce314) lin-15(n765ts) X</i>         | Vulval muscle Channelrhodopsin-2; VC GCaMP5, mCherry                                                   | this study                   |
| MIA250 | <i>keyIs48; vsIs164 lite-1(ce314) lin-15(n765ts) X</i>          | Vulval muscle Channelrhodopsin-2, GCaMP5, mCherry                                                      | this study                   |

|        |                                                                         |                                                                                                               |                              |
|--------|-------------------------------------------------------------------------|---------------------------------------------------------------------------------------------------------------|------------------------------|
| MIA298 | <i>keyIs48; vsIs172; unc-54(e190) I; lite-1(ce314) lin-15(n765ts) X</i> | Vulval muscle Channelrhodopsin-2; VC GCaMP5, mCherry; <i>unc-54</i> myosin heavy chain null mutant background | this study                   |
| MIA26  | <i>egl-1(n986dm) V</i>                                                  | No HSNs                                                                                                       | (Ravi, Garcia, et al., 2018) |
| N2     | <i>wild type</i>                                                        | Bristol wild-type strain                                                                                      | (Brenner, 1974)              |
| LX1970 | <i>wzIs30 IV; vsIs172; lite-1(ce314) lin-15(n765ts) X</i>               | HSN Channelrhodopsin-2; VC GCaMP5, mCherry                                                                    | (Collins et al., 2016)       |

814 **References**

- 815 Altun, Z. F., Chen, B., Wang, Z.-W., & Hall, D. H. (2009). High resolution map of *Caenorhabditis*  
816 *elegans* gap junction proteins. *Developmental Dynamics*, 238(8), 1936–1950.  
817 <https://doi.org/10.1002/dvdy.22025>
- 818 Banerjee, N., Bhattacharya, R., Gorczyca, M., Collins, K. M., & Francis, M. M. (2017). Local  
819 neuropeptide signaling modulates serotonergic transmission to shape the temporal organization  
820 of *C. elegans* egg-laying behavior. *PLOS Genetics*, 13(4), e1006697.  
821 <https://doi.org/10.1371/journal.pgen.1006697>
- 822 Bany, I. A., Dong, M.-Q., & Koelle, M. R. (2003). Genetic and Cellular Basis for Acetylcholine  
823 Inhibition of *Caenorhabditis elegans* Egg-Laying Behavior. *Journal of Neuroscience*, 23(22),  
824 8060–8069. <https://doi.org/10.1523/JNEUROSCI.23-22-08060.2003>
- 825 Bargmann, C. I. (2012). Beyond the connectome: How neuromodulators shape neural circuits.  
826 *BioEssays: News and Reviews in Molecular, Cellular and Developmental Biology*, 34(6), 458–  
827 465. <https://doi.org/10.1002/bies.201100185>
- 828 Bargmann, C. I., & Marder, E. (2013). From the connectome to brain function. *Nature Methods*, 10(6),  
829 483–490. <https://doi.org/10.1038/nmeth.2451>
- 830 Bartussek, J., & Lehmann, F.-O. (2016). Proprioceptive feedback determines visuomotor gain in  
831 *Drosophila*. *Royal Society Open Science*, 3(1). <https://doi.org/10.1098/rsos.150562>
- 832 Batista-García-Ramó, K., & Fernández-Verdecia, C. I. (2018). What We Know About the Brain  
833 Structure-Function Relationship. *Behavioral Sciences (Basel, Switzerland)*, 8(4).  
834 <https://doi.org/10.3390/bs8040039>
- 835 Bentley, B., Branicky, R., Barnes, C. L., Chew, Y. L., Yemini, E., Bullmore, E. T., Vértés, P. E., &  
836 Schafer, W. R. (2016). The Multilayer Connectome of *Caenorhabditis elegans*. *PLoS*  
837 *Computational Biology*, 12(12), e1005283. <https://doi.org/10.1371/journal.pcbi.1005283>
- 838 Brenner, S. (1974). The Genetics of CAENORHABDITIS ELEGANS. *Genetics*, 77(1), 71–94.

- 839 Brewer, J. C., Olson, A. C., Collins, K. M., & Koelle, M. R. (2019). Serotonin and neuropeptides are  
840 both released by the HSN command neuron to initiate *Caenorhabditis elegans* egg laying. *PLOS*  
841 *Genetics*, *15*(1), e1007896. <https://doi.org/10.1371/journal.pgen.1007896>
- 842 Chase, D. L., Pepper, J. S., & Koelle, M. R. (2004). Mechanism of extrasynaptic dopamine signaling in  
843 *Caenorhabditis elegans*. *Nature Neuroscience*, *7*(10), 1096–1103. <https://doi.org/10.1038/nm1316>
- 844 Clark, S. G., Lu, X., & Horvitz, H. R. (1994). The *Caenorhabditis elegans* locus *lin-15*, a negative  
845 regulator of a tyrosine kinase signaling pathway, encodes two different proteins. *Genetics*,  
846 *137*(4), 987–997.
- 847 Collins, K. M., Bode, A., Fernandez, R. W., Tanis, J. E., Brewer, J. C., Creamer, M. S., & Koelle, M. R.  
848 (2016). Activity of the *C. elegans* egg-laying behavior circuit is controlled by competing  
849 activation and feedback inhibition. *ELife*, *5*, e21126. <https://doi.org/10.7554/eLife.21126>
- 850 Collins, K. M., & Koelle, M. R. (2013). Postsynaptic ERG potassium channels limit muscle excitability  
851 to allow distinct egg-laying behavior states in *Caenorhabditis elegans*. *The Journal of*  
852 *Neuroscience: The Official Journal of the Society for Neuroscience*, *33*(2), 761–775.  
853 <https://doi.org/10.1523/JNEUROSCI.3896-12.2013>
- 854 Cook, S. J., Jarrell, T. A., Brittin, C. A., Wang, Y., Bloniarz, A. E., Yakovlev, M. A., Nguyen, K. C. Q.,  
855 Tang, L. T.-H., Bayer, E. A., Duerr, J. S., Bülow, H. E., Hobert, O., Hall, D. H., & Emmons, S.  
856 W. (2019). Whole-animal connectomes of both *Caenorhabditis elegans* sexes. *Nature*,  
857 *571*(7763), 63–71. <https://doi.org/10.1038/s41586-019-1352-7>
- 858 Dittman, J. S., & Kaplan, J. M. (2008). Behavioral impact of neurotransmitter-activated G-protein-  
859 coupled receptors: Muscarinic and GABAB receptors regulate *Caenorhabditis elegans*  
860 locomotion. *The Journal of Neuroscience: The Official Journal of the Society for Neuroscience*,  
861 *28*(28), 7104–7112. <https://doi.org/10.1523/JNEUROSCI.0378-08.2008>

- 862 Donnelly, J. L., Clark, C. M., Leifer, A. M., Pirri, J. K., Haburcak, M., Francis, M. M., Samuel, A. D. T.,  
863 & Alkema, M. J. (2013). Monoaminergic Orchestration of Motor Programs in a Complex C.  
864 elegans Behavior. *PLoS Biology*, *11*(4), e1001529. <https://doi.org/10.1371/journal.pbio.1001529>
- 865 Duerr, J. S., Gaskin, J., & Rand, J. B. (2001). Identified neurons in *C. elegans* coexpress vesicular  
866 transporters for acetylcholine and monoamines. *American Journal of Physiology. Cell*  
867 *Physiology*, *280*(6), C1616-1622. <https://doi.org/10.1152/ajpcell.2001.280.6.C1616>
- 868 Duerr, J. S., Han, H.-P., Fields, S. D., & Rand, J. B. (2008). Identification of major classes of  
869 cholinergic neurons in the nematode *Caenorhabditis elegans*. *Journal of Comparative Neurology*,  
870 *506*(3), 398–408. <https://doi.org/10.1002/cne.21551>
- 871 Emtage, L., Aziz-Zaman, S., Padovan-Merhar, O., Horvitz, H. R., Fang-Yen, C., & Ringstad, N. (2012).  
872 IRK-1 Potassium Channels Mediate Peptidergic Inhibition of *Caenorhabditis elegans* Serotonin  
873 Neurons via a Go Signaling Pathway. *Journal of Neuroscience*, *32*(46), 16285–16295.  
874 <https://doi.org/10.1523/JNEUROSCI.2667-12.2012>
- 875 Fang, Y., Nakashima, R., Matsumiya, K., Kuriki, I., & Shioiri, S. (2015). Eye-Head Coordination for  
876 Visual Cognitive Processing. *PLoS ONE*, *10*(3). <https://doi.org/10.1371/journal.pone.0121035>
- 877 Fernandez, R. W., Wei, K., Wang, E. Y., Mikalauskaite, D., Olson, A., Pepper, J., Christie, N., Kim, S.,  
878 & Koelle, M. R. (2020). Cellular expression and functional roles of all 26 neurotransmitter  
879 GPCRs in the *C. elegans* egg-laying circuit. *BioRxiv*, 2020.04.23.037242.  
880 <https://doi.org/10.1101/2020.04.23.037242>
- 881 Hapiak, V. M., Hobson, R. J., Hughes, L., Smith, K., Harris, G., Condon, C., Komuniecki, P., &  
882 Komuniecki, R. W. (2009). Dual Excitatory and Inhibitory Serotonergic Inputs Modulate Egg  
883 Laying in *Caenorhabditis elegans*. *Genetics*, *181*(1), 153–163.  
884 <https://doi.org/10.1534/genetics.108.096891>

- 885 Hardaker, L. A., Singer, E., Kerr, R., Zhou, G., & Schafer, W. R. (2001). Serotonin modulates  
886 locomotory behavior and coordinates egg-laying and movement in *Caenorhabditis elegans*.  
887 *Journal of Neurobiology*, *49*(4), 303–313. <https://doi.org/10.1002/neu.10014>
- 888 Hobson, R. J., Hapiak, V. M., Xiao, H., Buehrer, K. L., Komuniecki, P. R., & Komuniecki, R. W.  
889 (2006). SER-7, a *Caenorhabditis elegans* 5-HT7-like Receptor, Is Essential for the 5-HT  
890 Stimulation of Pharyngeal Pumping and Egg Laying. *Genetics*, *172*(1), 159–169.  
891 <https://doi.org/10.1534/genetics.105.044495>
- 892 Jose, A. M., Bany, I. A., Chase, D. L., & Koelle, M. R. (2007). A Specific Subset of Transient Receptor  
893 Potential Vanilloid-Type Channel Subunits in *Caenorhabditis elegans* Endocrine Cells Function  
894 as Mixed Heteromers to Promote Neurotransmitter Release. *Genetics*, *175*(1), 93–105.  
895 <https://doi.org/10.1534/genetics.106.065516>
- 896 Kim, J., Poole, D. S., Waggoner, L. E., Kempf, A., Ramirez, D. S., Treschow, P. A., & Schafer, W. R.  
897 (2001). Genes affecting the activity of nicotinic receptors involved in *Caenorhabditis elegans*  
898 egg-laying behavior. *Genetics*, *157*(4), 1599–1610.
- 899 Koelle, M. R. (2018). Neurotransmitter signaling through heterotrimeric G proteins: Insights from  
900 studies in *C. elegans*. *WormBook : The Online Review of C. Elegans Biology*.  
901 <https://doi.org/10.1895/wormbook.1.75.2>
- 902 Koelle, M. R., & Horvitz, H. R. (1996). EGL-10 regulates G protein signaling in the *C. elegans* nervous  
903 system and shares a conserved domain with many mammalian proteins. *Cell*, *84*(1), 115–125.  
904 [https://doi.org/10.1016/s0092-8674\(00\)80998-8](https://doi.org/10.1016/s0092-8674(00)80998-8)
- 905 Lerner, T. N., Ye, L., & Deisseroth, K. (2016). Communication in Neural Circuits: Tools, Opportunities,  
906 and Challenges. *Cell*, *164*(6), 1136–1150. <https://doi.org/10.1016/j.cell.2016.02.027>
- 907 Li, P., Collins, K. M., Koelle, M. R., & Shen, K. (2013). LIN-12/Notch signaling instructs postsynaptic  
908 muscle arm development by regulating UNC-40/DCC and MADD-2 in *Caenorhabditis elegans*.  
909 *ELife*, *2*. <https://doi.org/10.7554/eLife.00378>

- 910 Lopes, G., Bonacchi, N., Frazão, J., Neto, J. P., Atallah, B. V., Soares, S., Moreira, L., Matias, S.,  
911 Itskov, P. M., Correia, P. A., Medina, R. E., Calcaterra, L., Dreosti, E., Paton, J. J., & Kampff, A.  
912 R. (2015). Bonsai: An event-based framework for processing and controlling data streams.  
913 *Frontiers in Neuroinformatics*, 9, 7. <https://doi.org/10.3389/fninf.2015.00007>
- 914 Lukos, J. R., Snider, J., Hernandez, M. E., Tunik, E., Hillyard, S., & Poizner, H. (2013). Parkinson's  
915 disease patients show impaired corrective grasp control and eye-hand coupling when reaching to  
916 grasp virtual objects. *Neuroscience*, 254, 205–221.  
917 <https://doi.org/10.1016/j.neuroscience.2013.09.026>
- 918 Meinertzhagen, I. A. (2018). Of what use is connectomics? A personal perspective on the *Drosophila*  
919 connectome. *The Journal of Experimental Biology*, 221(Pt 10).  
920 <https://doi.org/10.1242/jeb.164954>
- 921 Pereira, L., Kratsios, P., Serrano-Saiz, E., Sheftel, H., Mayo, A. E., Hall, D. H., White, J. G., LeBoeuf,  
922 B., Garcia, L. R., Alon, U., & Hobert, O. (2015). A cellular and regulatory map of the  
923 cholinergic nervous system of *C. elegans*. *ELife*, 4, e12432. <https://doi.org/10.7554/eLife.12432>
- 924 Pirri, J. K., McPherson, A. D., Donnelly, J. L., Francis, M. M., & Alkema, M. J. (2009). A tyramine-  
925 gated chloride channel coordinates distinct motor programs of a *Caenorhabditis elegans* escape  
926 response. *Neuron*, 62(4), 526–538. <https://doi.org/10.1016/j.neuron.2009.04.013>
- 927 Pokala, N., Liu, Q., Gordus, A., & Bargmann, C. I. (2014). Inducible and titratable silencing of  
928 *Caenorhabditis elegans* neurons in vivo with histamine-gated chloride channels. *Proceedings of*  
929 *the National Academy of Sciences*, 111(7), 2770–2775. <https://doi.org/10.1073/pnas.1400615111>
- 930 Ravi, B., Garcia, J., & Collins, K. M. (2018). Homeostatic Feedback Modulates the Development of  
931 Two-State Patterned Activity in a Model Serotonin Motor Circuit in *Caenorhabditis elegans*.  
932 *Journal of Neuroscience*, 38(28), 6283–6298. [https://doi.org/10.1523/JNEUROSCI.3658-](https://doi.org/10.1523/JNEUROSCI.3658-17.2018)  
933 17.2018

- 934 Ravi, B., Nassar, L. M., Kopchock, R. J., III, Dhakal, P., Scheetz, M., & Collins, K. M. (2018).  
935 Ratiometric Calcium Imaging of Individual Neurons in Behaving *Caenorhabditis Elegans*. *JoVE*  
936 (*Journal of Visualized Experiments*), 132, e56911. <https://doi.org/10.3791/56911>
- 937 Richmond, J. E., & Jorgensen, E. M. (1999). One GABA and two acetylcholine receptors function at the  
938 *C. elegans* neuromuscular junction. *Nature Neuroscience*, 2(9), 791–797.  
939 <https://doi.org/10.1038/12160>
- 940 Schafer, W. R. (2006). Genetics of Egg-Laying in Worms. *Annual Review of Genetics*, 40(1), 487–509.  
941 <https://doi.org/10.1146/annurev.genet.40.110405.090527>
- 942 Schafer, W. R., Sanchez, B. M., & Kenyon, C. (1996). *Genes Affecting Sensitivity to Serotonin in*  
943 *Caenorhabditis elegans*. 12.
- 944 Schindelin, J., Arganda-Carreras, I., Frise, E., Kaynig, V., Longair, M., Pietzsch, T., Preibisch, S.,  
945 Rueden, C., Saalfeld, S., Schmid, B., Tinevez, J.-Y., White, D. J., Hartenstein, V., Eliceiri, K.,  
946 Tomancak, P., & Cardona, A. (2012). Fiji: An open-source platform for biological-image  
947 analysis. *Nature Methods*, 9(7), 676–682. <https://doi.org/10.1038/nmeth.2019>
- 948 Sengupta, P., & Samuel, A. D. T. (2009). *C. elegans*: A model system for systems neuroscience. *Current*  
949 *Opinion in Neurobiology*, 19(6), 637–643. <https://doi.org/10.1016/j.conb.2009.09.009>
- 950 Shyn, S. I., Kerr, R., & Schafer, W. R. (2003). Serotonin and Go Modulate Functional States of Neurons  
951 and Muscles Controlling *C. elegans* Egg-Laying Behavior. *Current Biology*, 13(21), 1910–1915.  
952 <https://doi.org/10.1016/j.cub.2003.10.025>
- 953 Song, B., Faumont, S., Lockery, S., & Avery, L. (2013). Recognition of familiar food activates feeding  
954 via an endocrine serotonin signal in *Caenorhabditis elegans*. *ELife*, 2.  
955 <https://doi.org/10.7554/eLife.00329>
- 956 Trent, C., Tsuing, N., & Horvitz, H. R. (1983). Egg-laying defective mutants of the nematode  
957 *Caenorhabditis elegans*. *Genetics*, 104(4), 619–647.



- 958 Trojanowski, N. F., Raizen, D. M., & Fang-Yen, C. (2016). Pharyngeal pumping in *Caenorhabditis*  
959 *elegans* depends on tonic and phasic signaling from the nervous system. *Scientific Reports*, *6*(1),  
960 22940. <https://doi.org/10.1038/srep22940>
- 961 Waggoner, L. E., Dickinson, K. A., Poole, D. S., Tabuse, Y., Miwa, J., & Schafer, W. R. (2000). Long-  
962 term nicotine adaptation in *Caenorhabditis elegans* involves PKC-dependent changes in nicotinic  
963 receptor abundance. *The Journal of Neuroscience: The Official Journal of the Society for*  
964 *Neuroscience*, *20*(23), 8802–8811.
- 965 Waggoner, L. E., Zhou, G. T., Schafer, R. W., & Schafer, W. R. (1998). Control of Alternative  
966 Behavioral States by Serotonin in *Caenorhabditis elegans*. *Neuron*, *21*(1), 203–214.  
967 [https://doi.org/10.1016/S0896-6273\(00\)80527-9](https://doi.org/10.1016/S0896-6273(00)80527-9)
- 968 Walker, D. S., & Schafer, W. R. (2020). Distinct roles for innexin gap junctions and hemichannels in  
969 mechanosensation. *ELife*, *9*, e50597. <https://doi.org/10.7554/eLife.50597>
- 970 White, J. G., Southgate, E., Thomson, J. N., & Brenner, S. (1986). The structure of the nervous system  
971 of the nematode *Caenorhabditis elegans*. *Philosophical Transactions of the Royal Society of*  
972 *London. Series B, Biological Sciences*, *314*(1165), 1–340. <https://doi.org/10.1098/rstb.1986.0056>
- 973 Xiao, H., Hapiak, V. M., Smith, K. A., Lin, L., Hobson, R. J., Plenefisch, J., & Komuniecki, R. (2006).  
974 SER-1, a *Caenorhabditis elegans* 5-HT<sub>2</sub>-like receptor, and a multi-PDZ domain containing  
975 protein (MPZ-1) interact in vulval muscle to facilitate serotonin-stimulated egg-laying.  
976 *Developmental Biology*, *298*(2), 379–391. <https://doi.org/10.1016/j.ydbio.2006.06.044>
- 977 Yeon, J., Kim, J., Kim, D.-Y., Kim, H., Kim, J., Du, E. J., Kang, K., Lim, H.-H., Moon, D., & Kim, K.  
978 (2018). A sensory-motor neuron type mediates proprioceptive coordination of steering in *C.*  
979 *elegans* via two TRPC channels. *PLOS Biology*, *16*(6), e2004929.  
980 <https://doi.org/10.1371/journal.pbio.2004929>
- 981 Zhang, M., Chung, S. H., Fang-Yen, C., Craig, C., Kerr, R. A., Suzuki, H., Samuel, A. D. T., Mazur, E.,  
982 & Schafer, W. R. (2008). A self-regulating feed-forward circuit controlling *C. elegans* egg-

- 983            laying behavior. *Current Biology: CB*, 18(19), 1445–1455.
- 984            <https://doi.org/10.1016/j.cub.2008.08.047>
- 985    Zhang, M., Schafer, W. R., & Breitling, R. (2010). A circuit model of the temporal pattern generator of
- 986            *Caenorhabditis* egg-laying behavior. *BMC Systems Biology*, 4(1), 81.
- 987            <https://doi.org/10.1186/1752-0509-4-81>
- 988    Zhen, M., & Samuel, A. D. (2015). *C. elegans* locomotion: Small circuits, complex functions. *Current*
- 989            *Opinion in Neurobiology*, 33, 117–126. <https://doi.org/10.1016/j.conb.2015.03.009>
- 990
